# Supplementary material for: Text mining-based word representations for biomedical data analysis and machine learning tasks
Source: bioRxiv preprint, doi:10.1101/2020.12.09.417733, version 1 (2020-12-10)
Supplement: Supplemental File 1 [file 417733_file04.csv]

data type	group size	lower quartile	median	upper quartile	GO biological process name
GOBP	23	0.187515105	0.289037025	0.38768283	mitochondrial genome maintenance
GOBP	1326	0.15439812	0.247906117	0.344178438	reproduction
GOBP	11	0.125019713	0.268606688	0.471230902	single strand break repair
GOBP	84	0.155275403	0.258223788	0.383687692	regulation of DNA recombination
GOBP	28	0.172099946	0.330712103	0.440455747	ribosomal large subunit assembly
GOBP	17	0.183040978	0.306824025	0.406598125	ribosomal small subunit assembly
GOBP	30	0.190129396	0.349493094	0.489930754	very long-chain fatty acid metabolic process
GOBP	118	0.182940653	0.285082309	0.389299794	transition metal ion transport
GOBP	90	0.288705701	0.394967628	0.497762616	autophagosome assembly
GOBP	13	0.221721371	0.319064668	0.448943597	ribosomal subunit export from nucleus
GOBP	148	0.267689784	0.418633904	0.533044425	mitotic sister chromatid segregation
GOBP	209	0.2361943	0.357875922	0.465280369	cell cycle checkpoint
GOBP	17	0.369226576	0.476227106	0.598487965	DNA replication checkpoint
GOBP	142	0.247890441	0.369615005	0.47071434	DNA damage checkpoint
GOBP	90	0.271525676	0.373076544	0.486101788	regulation of cyclin-dependent protein serine/threonine kinase activity
GOBP	243	0.216405414	0.335140171	0.450300105	G1/S transition of mitotic cell cycle
GOBP	32	0.311485152	0.408738284	0.513881807	regulation of transcription involved in G1/S transition of mitotic cell cycle
GOBP	231	0.222730228	0.336186466	0.434951954	G2/M transition of mitotic cell cycle
GOBP	33	0.117340578	0.244725085	0.370948462	sulfur amino acid metabolic process
GOBP	15	0.196396177	0.299832648	0.393344209	sulfur amino acid biosynthetic process
GOBP	11	0.11110867	0.207311885	0.290435364	sulfur amino acid catabolic process
GOBP	815	0.212789551	0.331969313	0.444787817	negative regulation of transcription by RNA polymerase II
GOBP	29	0.223038356	0.319315741	0.446006386	establishment of mitotic spindle orientation
GOBP	26	0.231035163	0.364161726	0.459638203	rRNA modification
GOBP	840	0.15234816	0.252339277	0.357092323	MAPK cascade
GOBP	11	0.197371716	0.335535707	0.616190496	chromatin silencing at rDNA
GOBP	119	0.233359623	0.376196463	0.555238028	nuclear-transcribed mRNA catabolic process, nonsense-mediated decay
GOBP	11	0.334895468	0.373493327	0.516432078	activation of MAPKKK activity
GOBP	48	0.211641082	0.328383014	0.447812337	activation of MAPKK activity
GOBP	141	0.178070372	0.270912849	0.381119528	activation of MAPK activity
GOBP	25	0.36762901	0.473655212	0.583661982	inactivation of MAPK activity
GOBP	296	0.249519309	0.379934946	0.485922148	protein polyubiquitination
GOBP	11	0.237939417	0.337843436	0.424987444	meiotic spindle organization
GOBP	522	0.193203899	0.306738661	0.41341955	microtubule cytoskeleton organization
GOBP	12	0.315829717	0.433767657	0.524604276	spliceosomal tri-snRNP complex assembly
GOBP	51	0.181575941	0.336787227	0.478720024	spliceosomal complex assembly
GOBP	37	0.190047773	0.289401048	0.419579093	mitochondrial fission
GOBP	66	0.15084255	0.255750204	0.359827277	polysaccharide biosynthetic process
GOBP	26	0.162576093	0.264604694	0.38945952	polysaccharide catabolic process
GOBP	975	0.196398427	0.316148146	0.425507889	mitotic cell cycle
GOBP	381	0.191559892	0.32372111	0.445267366	nuclear division
GOBP	67	0.217633442	0.372644809	0.509234869	mitotic cytokinesis
GOBP	65	0.188424542	0.310953688	0.476377642	nuclear-transcribed mRNA catabolic process, deadenylation-dependent decay
GOBP	27	0.203044839	0.328460456	0.492639689	nuclear-transcribed mRNA poly(A) tail shortening
GOBP	33	0.230288112	0.384841799	0.514132615	nuclear-transcribed mRNA catabolic process, exonucleolytic
GOBP	211	0.140704898	0.237537013	0.333611401	response to reactive oxygen species
GOBP	27	0.130669046	0.21974532	0.325640793	response to superoxide
GOBP	28	0.132939738	0.215617103	0.322618097	response to oxygen radical
GOBP	10	0.217751823	0.399799559	0.610529921	protein deneddylation
GOBP	323	0.217306611	0.354033174	0.468379938	RNA splicing, via transesterification reactions
GOBP	320	0.215845043	0.352408299	0.466711845	RNA splicing, via transesterification reactions with bulged adenosine as nucleophile
GOBP	84	0.240295132	0.386939655	0.516885085	alternative mRNA splicing, via spliceosome
GOBP	73	0.246997632	0.388006034	0.525289207	regulation of alternative mRNA splicing, via spliceosome
GOBP	34	0.244294546	0.398091732	0.500359324	spliceosomal snRNP assembly
GOBP	15	0.076141108	0.291825701	0.429104296	RNA splicing, via endonucleolytic cleavage and ligation
GOBP	320	0.215845043	0.352408299	0.466711845	mRNA splicing, via spliceosome
GOBP	35	0.225497851	0.316922977	0.404138395	protein peptidyl-prolyl isomerization
GOBP	72	0.267166394	0.364127933	0.474927799	autophagy of mitochondrion
GOBP	23	0.319979207	0.405667175	0.517946433	mitophagy
GOBP	32	0.178319103	0.310543145	0.413008462	maturation of 5.8S rRNA
GOBP	30	0.228674663	0.34331302	0.438597541	maturation of SSU-rRNA from tricistronic rRNA transcript (SSU-rRNA, 5.8S rRNA, LSU-rRNA)
GOBP	14	0.212175709	0.293872151	0.38453271	maturation of LSU-rRNA from tricistronic rRNA transcript (SSU-rRNA, 5.8S rRNA, LSU-rRNA)
GOBP	23	0.173945191	0.297616947	0.407462002	maturation of 5.8S rRNA from tricistronic rRNA transcript (SSU-rRNA, 5.8S rRNA, LSU-rRNA)
GOBP	25	0.230069949	0.359800268	0.451661919	cleavage involved in rRNA processing
GOBP	25	0.247014191	0.349392412	0.44284952	maturation of LSU-rRNA
GOBP	15	0.322499683	0.389796043	0.449113156	endonucleolytic cleavage involved in rRNA processing
GOBP	15	0.322499683	0.389796043	0.449113156	endonucleolytic cleavage of tricistronic rRNA transcript (SSU-rRNA, 5.8S rRNA, LSU-rRNA)
GOBP	37	0.297480701	0.395791694	0.505911847	embryonic axis specification
GOBP	15	0.323429655	0.433892963	0.555799671	resolution of meiotic recombination intermediates
GOBP	23	0.315255454	0.410423804	0.527466885	nucleotide-excision repair, DNA damage recognition
GOBP	22	0.293732079	0.404166606	0.498141794	nucleotide-excision repair, DNA duplex unwinding
GOBP	13	0.433141382	0.572596407	0.650633395	telomere maintenance via recombination
GOBP	133	0.22440507	0.351016185	0.460392346	telomere maintenance
GOBP	124	0.235231382	0.383819961	0.512146763	double-strand break repair via homologous recombination
GOBP	125	0.226743029	0.379582914	0.509596182	recombinational repair
GOBP	84	0.187417138	0.384191597	0.508652356	non-recombinational repair
GOBP	11	0.55505995	0.641890333	0.774204804	double-strand break repair via break-induced replication
GOBP	21	0.367920284	0.481931494	0.570635824	DNA double-strand break processing
GOBP	50	0.262599124	0.360648661	0.453585629	DNA synthesis involved in DNA repair
GOBP	31	0.188705466	0.294006641	0.381935913	DNA catabolic process, endonucleolytic
GOBP	55	0.108376806	0.213651722	0.312627714	syncytium formation by plasma membrane fusion
GOBP	179	0.254910159	0.40565407	0.51949912	sister chromatid segregation
GOBP	963	0.175109606	0.285360819	0.388835433	cell morphogenesis
GOBP	702	0.185049062	0.293475904	0.397044327	cell morphogenesis involved in differentiation
GOBP	145	0.192493037	0.31607704	0.449169079	cytokinesis
GOBP	198	0.194775587	0.320338739	0.456730255	nuclear-transcribed mRNA catabolic process
GOBP	41	0.193118507	0.337823662	0.45087709	mitochondrial RNA metabolic process
GOBP	14	0.188784608	0.390148514	0.500240018	mitochondrial RNA processing
GOBP	19	0.290222463	0.392531627	0.506156417	RNA 5'-end processing
GOBP	325	0.146590969	0.230042359	0.320625372	response to acid chemical
GOBP	12	0.157014873	0.386873426	0.579906154	formation of extrachromosomal circular DNA
GOBP	497	0.195805171	0.298742441	0.404989867	skeletal system development
GOBP	19	0.275270592	0.402111711	0.534279138	cartilage condensation
GOBP	374	0.168888042	0.27336146	0.379120697	ossification
GOBP	47	0.20896436	0.305101145	0.405257156	neurotransmitter uptake
GOBP	329	0.147297042	0.243113819	0.343717958	regulation of neurotransmitter levels
GOBP	123	0.237129819	0.357457468	0.481580334	action potential
GOBP	63	0.239550024	0.37368576	0.465582235	RNA methylation
GOBP	24	0.214056238	0.306971414	0.406091053	prostaglandin biosynthetic process
GOBP	12	0.324904686	0.436552603	0.528562109	pseudouridine synthesis
GOBP	103	0.173132478	0.269146097	0.384777746	retinoid metabolic process
GOBP	468	0.18024307	0.280338761	0.380884932	angiogenesis
GOBP	108	0.157384518	0.276979657	0.376362226	cilium or flagellum-dependent cell motility
GOBP	56	0.149153936	0.23925918	0.34546097	ovarian follicle development
GOBP	10	0.205373034	0.294035364	0.366383325	luteinization
GOBP	23	0.119205141	0.26827916	0.394608079	oocyte maturation
GOBP	385	0.177011967	0.275367758	0.371382732	regulation of cell growth
GOBP	21	0.246072837	0.404022501	0.497940346	response to protozoan
GOBP	639	0.182232558	0.280936904	0.381734634	blood vessel development
GOBP	31	0.246864283	0.348666254	0.461232334	branching involved in blood vessel morphogenesis
GOBP	78	0.185070299	0.32108545	0.439620719	vasculogenesis
GOBP	19	0.275972432	0.410983598	0.515915579	ganglioside metabolic process
GOBP	11	0.258689242	0.400807416	0.520474588	ganglioside biosynthetic process
GOBP	86	0.20926265	0.32014424	0.415929327	microtubule bundle formation
GOBP	33	0.198445986	0.288478644	0.453372077	detection of chemical stimulus involved in sensory perception of bitter taste
GOBP	203	0.168132701	0.287617376	0.40627228	osteoblast differentiation
GOBP	364	0.197749169	0.30429358	0.410104685	eye development
GOBP	311	0.205335522	0.307918499	0.415045361	urogenital system development
GOBP	86	0.264149512	0.375930729	0.495990617	metanephros development
GOBP	89	0.281980719	0.39173807	0.512308266	ureteric bud development
GOBP	54	0.312781022	0.420838359	0.545007119	branching involved in ureteric bud morphogenesis
GOBP	166	0.170062271	0.256245424	0.352212745	temperature homeostasis
GOBP	10	0.160529725	0.301644262	0.40534723	fever generation
GOBP	39	0.181070275	0.277515983	0.370014566	behavioral fear response
GOBP	334	0.129887855	0.224438296	0.327235372	response to hypoxia
GOBP	374	0.194497662	0.298129292	0.400482926	ameboidal-type cell migration
GOBP	18	0.190427016	0.292284814	0.383059796	acrosome assembly
GOBP	106	0.225356268	0.349645095	0.459128055	long-chain fatty acid metabolic process
GOBP	135	0.169675455	0.266682073	0.360850167	cellular glucose homeostasis
GOBP	10	0.632096019	0.722825159	0.762952958	tRNA 5'-leader removal
GOBP	18	0.165441271	0.254058288	0.364139347	gastric acid secretion
GOBP	363	0.177572022	0.277667242	0.378104263	in utero embryonic development
GOBP	24	0.28893115	0.377019947	0.460060579	gastrulation with mouth forming second
GOBP	119	0.221125318	0.326648659	0.442149974	formation of primary germ layer
GOBP	53	0.238655233	0.328346208	0.435031003	endoderm formation
GOBP	69	0.215580372	0.32355926	0.455698594	mesoderm formation
GOBP	94	0.326727478	0.455090554	0.564174018	cell fate specification
GOBP	41	0.324348561	0.472439856	0.58777511	cell fate determination
GOBP	18	0.304855167	0.479191209	0.569499249	mesodermal cell fate commitment
GOBP	15	0.283419294	0.346253082	0.543363002	endodermal cell fate commitment
GOBP	15	0.47413611	0.591860722	0.672269602	formation of cytoplasmic translation initiation complex
GOBP	113	0.18926465	0.315764905	0.449379327	establishment of planar polarity
GOBP	136	0.204365762	0.326024377	0.45146965	morphogenesis of a polarized epithelium
GOBP	43	0.20127346	0.308234427	0.405772368	eye photoreceptor cell differentiation
GOBP	50	0.287936233	0.385919408	0.489183967	neural crest cell migration
GOBP	68	0.265532692	0.387401363	0.504180428	somitogenesis
GOBP	23	0.369970438	0.496110589	0.596962433	organ induction
GOBP	187	0.210888656	0.32491839	0.443042607	morphogenesis of a branching structure
GOBP	156	0.193089338	0.304804241	0.409558455	neuron migration
GOBP	13	0.208333376	0.292651696	0.404230585	establishment of lymphocyte polarity
GOBP	12	0.208333376	0.285881728	0.391292024	establishment of T cell polarity
GOBP	15	0.178648588	0.31684411	0.409294285	immunological synapse formation
GOBP	27	0.184085865	0.288426791	0.433134674	myeloid dendritic cell activation
GOBP	42	0.19263111	0.280557685	0.378225481	microglial cell activation
GOBP	1307	0.138060504	0.228686315	0.322434094	cell activation
GOBP	80	0.138123898	0.238574277	0.336273301	leukocyte homeostasis
GOBP	12	0.334959454	0.417385024	0.492053369	plasma membrane repair
GOBP	21	0.154386852	0.231910532	0.345802412	natural killer cell differentiation
GOBP	16	0.237026091	0.282597384	0.402828901	neutrophil homeostasis
GOBP	26	0.193336648	0.292460347	0.387326836	B cell homeostasis
GOBP	23	0.203970013	0.306694223	0.396903761	B cell apoptotic process
GOBP	10	0.177135012	0.252722378	0.338207876	natural killer cell proliferation
GOBP	736	0.154053417	0.250962229	0.347817831	cytokine production
GOBP	667	0.153192705	0.250969609	0.349852169	regulation of cytokine production
GOBP	255	0.142759783	0.242851129	0.345654616	negative regulation of cytokine production
GOBP	427	0.156832082	0.251276716	0.349814336	positive regulation of cytokine production
GOBP	10	0.207121781	0.30085155	0.4210809	serotonin secretion
GOBP	14	0.121364578	0.210544915	0.418279473	histamine secretion
GOBP	269	0.20295887	0.306773656	0.414157782	kidney development
GOBP	93	0.285371619	0.394586328	0.514555737	mesonephros development
GOBP	92	0.180567904	0.275579422	0.381375657	blastocyst development
GOBP	38	0.189169058	0.2818376	0.403278002	blastocyst formation
GOBP	15	0.241357756	0.337035316	0.428952405	trophectodermal cell differentiation
GOBP	18	0.191392176	0.307872685	0.406203665	blastocyst growth
GOBP	13	0.20541458	0.320171991	0.394473259	inner cell mass cell proliferation
GOBP	21	0.171152886	0.252558827	0.353445921	blastocyst hatching
GOBP	55	0.159208744	0.262092406	0.38646946	release of cytochrome c from mitochondria
GOBP	142	0.228256439	0.33648889	0.444728081	epithelial to mesenchymal transition
GOBP	120	0.20536755	0.327647896	0.443662574	embryonic epithelial tube formation
GOBP	102	0.189218034	0.314156312	0.435116318	neural tube formation
GOBP	87	0.186935061	0.318549541	0.438353064	neural tube closure
GOBP	29	0.159117329	0.255722459	0.404504602	protein insertion into mitochondrial membrane involved in apoptotic signaling pathway
GOBP	15	0.199680981	0.291187587	0.380680086	phagolysosome assembly
GOBP	11	0.34969502	0.465340319	0.551008547	complement activation, lectin pathway
GOBP	29	0.217076907	0.338028822	0.458017182	receptor recycling
GOBP	64	0.173473937	0.290402179	0.392096704	endothelial cell development
GOBP	133	0.141707171	0.242435914	0.343210752	liver development
GOBP	152	0.186973941	0.284678926	0.386485415	placenta development
GOBP	89	0.21364873	0.315876302	0.417441082	embryonic placenta development
GOBP	34	0.172645858	0.260674671	0.34014729	maternal placenta development
GOBP	202	0.118820923	0.207631438	0.305769217	tissue homeostasis
GOBP	66	0.161785467	0.256011372	0.406334604	retina homeostasis
GOBP	157	0.140664477	0.225609876	0.316796279	cell killing
GOBP	99	0.149021131	0.24202255	0.339261642	leukocyte mediated cytotoxicity
GOBP	65	0.188326577	0.281051205	0.3902359	regulation of leukocyte mediated cytotoxicity
GOBP	12	0.257877899	0.34433656	0.434538524	negative regulation of leukocyte mediated cytotoxicity
GOBP	46	0.199996607	0.290545516	0.392402075	positive regulation of leukocyte mediated cytotoxicity
GOBP	40	0.169361244	0.246406788	0.324634879	T cell mediated cytotoxicity
GOBP	30	0.190117042	0.268848959	0.351192203	regulation of T cell mediated cytotoxicity
GOBP	24	0.194144165	0.269293558	0.333620607	positive regulation of T cell mediated cytotoxicity
GOBP	22	0.191932627	0.289924711	0.420117416	regulation of receptor recycling
GOBP	14	0.230356263	0.344395285	0.461016658	positive regulation of receptor recycling
GOBP	1347	0.156367038	0.254506562	0.357062189	regulation of protein phosphorylation
GOBP	378	0.176639438	0.284283149	0.390943516	negative regulation of protein phosphorylation
GOBP	947	0.154310946	0.249117175	0.350042263	positive regulation of protein phosphorylation
GOBP	144	0.189973168	0.281593544	0.374960458	endothelial cell proliferation
GOBP	128	0.188812191	0.283526856	0.381865987	regulation of endothelial cell proliferation
GOBP	38	0.141693768	0.251774491	0.36801508	negative regulation of endothelial cell proliferation
GOBP	90	0.19482605	0.286558068	0.38061601	positive regulation of endothelial cell proliferation
GOBP	38	0.204109772	0.291405381	0.394644595	postsynaptic membrane organization
GOBP	82	0.161023555	0.271695125	0.395318431	hair follicle development
GOBP	668	0.182232783	0.281234931	0.381166845	vasculature development
GOBP	25	0.229742819	0.356709642	0.472306786	lymph vessel development
GOBP	15	0.243290752	0.385531943	0.496223748	lymphangiogenesis
GOBP	61	0.232354454	0.359642514	0.464080984	heart looping
GOBP	117	0.146052341	0.251534686	0.363871791	regulation of cell-matrix adhesion
GOBP	38	0.121139395	0.229436251	0.360878119	negative regulation of cell-matrix adhesion
GOBP	53	0.170681899	0.27439179	0.382573319	positive regulation of cell-matrix adhesion
GOBP	23	0.27051228	0.385010052	0.487745929	positive regulation of neurotransmitter secretion
GOBP	29	0.244965348	0.342676391	0.425053043	endochondral ossification
GOBP	153	0.208505745	0.304999852	0.399118942	regulation of cytokine-mediated signaling pathway
GOBP	53	0.185239688	0.281671823	0.372949139	negative regulation of cytokine-mediated signaling pathway
GOBP	50	0.199944012	0.29764953	0.398089649	positive regulation of cytokine-mediated signaling pathway
GOBP	26	0.167942452	0.274164477	0.380362442	synaptic transmission, dopaminergic
GOBP	27	0.257901871	0.386704461	0.494773929	startle response
GOBP	12	0.20077475	0.303462839	0.384548882	suckling behavior
GOBP	12	0.16033729	0.234469705	0.404545038	G protein-coupled adenosine receptor signaling pathway
GOBP	38	0.162372975	0.243551367	0.349497197	blood vessel remodeling
GOBP	31	0.178743508	0.277678345	0.401266632	response to amphetamine
GOBP	10	0.19647614	0.2605341	0.365628986	nervous system process involved in regulation of systemic arterial blood pressure
GOBP	16	0.193546187	0.266458482	0.360232061	renal system process involved in regulation of blood volume
GOBP	35	0.15710507	0.247745698	0.367914429	regulation of systemic arterial blood pressure by hormone
GOBP	16	0.152404047	0.229774892	0.32395945	regulation of systemic arterial blood pressure by circulatory renin-angiotensin
GOBP	519	0.185377262	0.298516278	0.413740231	morphogenesis of an epithelium
GOBP	55	0.254039275	0.353347113	0.456572561	morphogenesis of an epithelial sheet
GOBP	27	0.162696049	0.244693128	0.331944993	response to dietary excess
GOBP	12	0.198380781	0.282724268	0.367836928	diet induced thermogenesis
GOBP	26	0.199672641	0.288255312	0.428838669	regulation of the force of heart contraction
GOBP	90	0.186529643	0.305447558	0.438676372	regulation of heart rate
GOBP	78	0.195737725	0.321504839	0.437102806	regulation of sodium ion transport
GOBP	22	0.178605143	0.306298609	0.475081442	desensitization of G protein-coupled receptor signaling pathway
GOBP	17	0.153749924	0.282934409	0.444383741	G protein-coupled receptor internalization
GOBP	115	0.201257883	0.306081655	0.409896119	sprouting angiogenesis
GOBP	51	0.210292223	0.316358347	0.433075829	cell migration involved in sprouting angiogenesis
GOBP	22	0.194823198	0.291176068	0.394349772	blood vessel endothelial cell proliferation involved in sprouting angiogenesis
GOBP	20	0.154308209	0.235092797	0.348824051	positive regulation of neuroblast proliferation
GOBP	22	0.282078032	0.382164296	0.535533259	positive regulation of mesenchymal cell proliferation
GOBP	115	0.207544718	0.325181838	0.440131807	chondrocyte differentiation
GOBP	45	0.153694233	0.295449238	0.429292223	chondrocyte development
GOBP	207	0.174822988	0.275753969	0.370325765	epithelial cell development
GOBP	112	0.204327969	0.305657257	0.422446111	columnar/cuboidal epithelial cell differentiation
GOBP	57	0.19569356	0.281786761	0.381077354	columnar/cuboidal epithelial cell development
GOBP	45	0.219711745	0.342516666	0.460747114	glandular epithelial cell differentiation
GOBP	24	0.205149552	0.308965701	0.397132554	glandular epithelial cell development
GOBP	16	0.199811732	0.341486886	0.451919642	epithelial cell maturation
GOBP	15	0.156199291	0.273227243	0.422433558	osteoblast development
GOBP	25	0.225077088	0.303422816	0.376389365	regulation of oxidative phosphorylation
GOBP	13	0.376513456	0.437937668	0.532583969	regulation of respiratory gaseous exchange by nervous system process
GOBP	79	0.221738388	0.314137376	0.432385559	lens development in camera-type eye
GOBP	20	0.267357144	0.353505559	0.445793012	lens morphogenesis in camera-type eye
GOBP	49	0.196959232	0.303025028	0.415015313	regulation of receptor internalization
GOBP	10	0.284237457	0.394015078	0.458763684	negative regulation of receptor internalization
GOBP	25	0.168897497	0.268019864	0.371739841	positive regulation of receptor internalization
GOBP	16	0.271884699	0.361093741	0.479560192	auditory receptor cell morphogenesis
GOBP	19	0.353730294	0.453673366	0.562543681	tRNA wobble base modification
GOBP	16	0.445861872	0.5200728	0.595089941	tRNA wobble uridine modification
GOBP	16	0.113092248	0.282810512	0.390716321	store-operated calcium entry
GOBP	91	0.287908769	0.383143393	0.47470479	cytoplasmic translation
GOBP	31	0.356284433	0.451607116	0.557868729	cytoplasmic translational initiation
GOBP	69	0.137297568	0.262539612	0.408720688	somatic diversification of immune receptors
GOBP	45	0.123168006	0.227136521	0.397448318	somatic recombination of immunoglobulin genes involved in immune response
GOBP	45	0.123168006	0.227136521	0.397448318	somatic diversification of immunoglobulins involved in immune response
GOBP	40	0.178552112	0.266687856	0.366490027	behavioral defense response
GOBP	130	0.157535772	0.259806402	0.372814498	activation of innate immune response
GOBP	105	0.154107255	0.259085766	0.382092485	innate immune response activating cell surface receptor signaling pathway
GOBP	187	0.196051831	0.30171885	0.404415459	pattern recognition receptor signaling pathway
GOBP	102	0.153794639	0.261356163	0.387037702	stimulatory C-type lectin receptor signaling pathway
GOBP	141	0.186954556	0.292363349	0.395721411	toll-like receptor signaling pathway
GOBP	12	0.181920569	0.251861201	0.353244818	innate immune response in mucosa
GOBP	57	0.174308255	0.285278945	0.405806021	natural killer cell mediated immunity
GOBP	27	0.205836373	0.295799943	0.391325828	positive regulation of defense response to virus by host
GOBP	318	0.139078761	0.228032892	0.328369781	response to molecule of bacterial origin
GOBP	155	0.158726203	0.252861863	0.351369802	hematopoietic progenitor cell differentiation
GOBP	406	0.145969097	0.238534505	0.342401265	adaptive immune response
GOBP	26	0.207226019	0.276325826	0.358723096	organ or tissue specific immune response
GOBP	1120	0.135083607	0.229705881	0.32651846	immune effector process
GOBP	436	0.133886934	0.231131404	0.335240314	activation of immune response
GOBP	57	0.113625551	0.221606471	0.321261465	lymphocyte homeostasis
GOBP	143	0.152112881	0.246189058	0.349720734	myeloid cell homeostasis
GOBP	654	0.128921441	0.225285624	0.322595641	cell activation involved in immune response
GOBP	42	0.19263111	0.280557685	0.378225481	leukocyte activation involved in inflammatory response
GOBP	601	0.133678246	0.228190488	0.325689582	myeloid leukocyte activation
GOBP	501	0.12975554	0.226654768	0.326549805	myeloid cell activation involved in immune response
GOBP	47	0.152703238	0.278670725	0.379830538	mast cell activation involved in immune response
GOBP	14	0.183409721	0.274227233	0.375551071	macrophage activation involved in immune response
GOBP	447	0.130008871	0.225641898	0.326612413	neutrophil activation involved in immune response
GOBP	170	0.154168833	0.254423952	0.355820638	lymphocyte activation involved in immune response
GOBP	101	0.197405233	0.295149834	0.390315574	T cell activation involved in immune response
GOBP	61	0.234724674	0.333273776	0.424529476	alpha-beta T cell activation involved in immune response
GOBP	68	0.224803404	0.32244188	0.416102685	T cell differentiation involved in immune response
GOBP	61	0.234724674	0.333273776	0.424529476	alpha-beta T cell differentiation involved in immune response
GOBP	60	0.233254302	0.332004056	0.424418063	CD4-positive, alpha-beta T cell differentiation involved in immune response
GOBP	16	0.217362109	0.341658167	0.468687725	T-helper cell lineage commitment
GOBP	69	0.130510853	0.232470649	0.362809182	B cell activation involved in immune response
GOBP	18	0.192825342	0.333238296	0.419547955	mature B cell differentiation involved in immune response
GOBP	19	0.237094992	0.331827211	0.431561734	lymphoid progenitor cell differentiation
GOBP	27	0.155291388	0.250146846	0.360644859	natural killer cell activation involved in immune response
GOBP	11	0.260103124	0.348679529	0.397869638	pro-B cell differentiation
GOBP	24	0.155862312	0.321455453	0.403716174	mature B cell differentiation
GOBP	23	0.151568905	0.226653335	0.321289544	response to tumor cell
GOBP	10	0.21525992	0.407786259	0.588963396	histamine production involved in inflammatory response
GOBP	25	0.215673551	0.331782579	0.431792216	T cell lineage commitment
GOBP	19	0.19784467	0.325845849	0.435308332	alpha-beta T cell lineage commitment
GOBP	651	0.129671804	0.225745425	0.322798832	leukocyte activation involved in immune response
GOBP	95	0.156323907	0.260300265	0.356060645	cytokine production involved in immune response
GOBP	39	0.171456695	0.276251348	0.387252402	T cell cytokine production
GOBP	12	0.111826085	0.262016027	0.374571016	dendritic cell cytokine production
GOBP	17	0.164567069	0.237072497	0.346160076	cytokine secretion involved in immune response
GOBP	2679	0.139836292	0.231840893	0.326145657	immune system process
GOBP	111	0.118475912	0.209063929	0.328173382	immunoglobulin production
GOBP	52	0.130776718	0.231907447	0.377187727	immunoglobulin production involved in immunoglobulin mediated immune response
GOBP	23	0.191314711	0.272559057	0.350004157	mucosal immune response
GOBP	24	0.193497043	0.303844499	0.419492673	dendritic cell chemotaxis
GOBP	18	0.171558574	0.238651454	0.371874045	immune response to tumor cell
GOBP	359	0.141933626	0.244393183	0.350827437	immune response-activating cell surface receptor signaling pathway
GOBP	12	0.246694961	0.386485858	0.524880155	complement receptor mediated signaling pathway
GOBP	101	0.149954198	0.279538816	0.43258043	Fc receptor mediated stimulatory signaling pathway
GOBP	96	0.153740826	0.28041912	0.434602837	immune response-regulating cell surface receptor signaling pathway involved in phagocytosis
GOBP	55	0.14022347	0.221186453	0.327244331	inflammatory response to antigenic stimulus
GOBP	23	0.118558342	0.187545275	0.26981667	acute inflammatory response to antigenic stimulus
GOBP	200	0.118335089	0.213773535	0.320688758	production of molecular mediator of immune response
GOBP	10	0.21525992	0.407786259	0.588963396	histamine secretion involved in inflammatory response
GOBP	743	0.125184176	0.21638144	0.313836751	leukocyte mediated immunity
GOBP	508	0.129550835	0.227072134	0.327155064	myeloid leukocyte mediated immunity
GOBP	457	0.128515269	0.224651773	0.325717691	neutrophil mediated immunity
GOBP	48	0.162593491	0.281390506	0.377513268	mast cell mediated immunity
GOBP	262	0.141286496	0.22485479	0.322616109	lymphocyte mediated immunity
GOBP	67	0.164328229	0.254375327	0.384630865	humoral immune response mediated by circulating immunoglobulin
GOBP	97	0.166401692	0.24670313	0.336932247	T cell mediated immunity
GOBP	266	0.146861631	0.23261669	0.334107643	adaptive immune response based on somatic recombination of immune receptors built from immunoglobulin superfamily domains
GOBP	14	0.264684281	0.364899897	0.469391033	germinal center formation
GOBP	12	0.214000364	0.327166695	0.41422157	dendritic cell antigen processing and presentation
GOBP	88	0.144916211	0.272168587	0.386999786	antigen processing and presentation of peptide antigen via MHC class I
GOBP	13	0.195758888	0.27250167	0.374324833	antigen processing and presentation via MHC class Ib
GOBP	149	0.178154384	0.288599888	0.384176034	antigen processing and presentation of exogenous peptide antigen
GOBP	65	0.150657687	0.28015586	0.422347477	antigen processing and presentation of exogenous peptide antigen via MHC class I, TAP-dependent
GOBP	11	0.225357161	0.281429649	0.345592292	antigen processing and presentation of endogenous peptide antigen
GOBP	83	0.211648866	0.311947542	0.408395311	antigen processing and presentation of peptide antigen via MHC class II
GOBP	84	0.205859913	0.30785514	0.405736232	antigen processing and presentation of peptide or polysaccharide antigen via MHC class II
GOBP	18	0.228157503	0.312821336	0.42646355	tolerance induction
GOBP	904	0.151749277	0.245700708	0.34484902	immune system development
GOBP	490	0.15459344	0.249010461	0.34827299	leukocyte differentiation
GOBP	16	0.108786337	0.229487952	0.343480864	leukocyte migration involved in inflammatory response
GOBP	102	0.108925394	0.200734188	0.305035769	acute inflammatory response
GOBP	69	0.095825367	0.192528252	0.320535459	production of molecular mediator involved in inflammatory response
GOBP	44	0.121409863	0.235411696	0.369361478	cytokine production involved in inflammatory response
GOBP	18	0.179161581	0.297741907	0.37866714	chronic inflammatory response
GOBP	63	0.160801512	0.272642015	0.411063626	monocyte chemotaxis
GOBP	11	0.180475373	0.288202566	0.44816253	mast cell chemotaxis
GOBP	10	0.21525992	0.407786259	0.588963396	histamine secretion by mast cell
GOBP	61	0.160867525	0.276967508	0.419067062	somatic diversification of immune receptors via germline recombination within a single locus
GOBP	14	0.035533765	0.331538428	0.452950665	somatic diversification of immune receptors via somatic mutation
GOBP	191	0.141784824	0.238676319	0.345326902	myeloid leukocyte differentiation
GOBP	112	0.129295367	0.230591455	0.337618694	platelet degranulation
GOBP	19	0.150107997	0.245706987	0.351505485	regulation of antigen processing and presentation
GOBP	11	0.195210599	0.304554106	0.402545264	regulation of dendritic cell antigen processing and presentation
GOBP	59	0.139628269	0.233234957	0.375171092	regulation of immunoglobulin production
GOBP	13	0.230858964	0.312567758	0.374602503	negative regulation of immunoglobulin production
GOBP	36	0.106398378	0.188941963	0.305668489	positive regulation of immunoglobulin production
GOBP	12	0.219170026	0.319294411	0.44072435	regulation of tolerance induction
GOBP	45	0.106627977	0.194355589	0.30277135	regulation of acute inflammatory response
GOBP	13	0.109722763	0.213718445	0.286281625	negative regulation of acute inflammatory response
GOBP	27	0.122899732	0.211089955	0.336515504	positive regulation of acute inflammatory response
GOBP	12	0.037957668	0.120296917	0.206434077	respiratory burst involved in defense response
GOBP	1390	0.139397444	0.231573889	0.327885332	regulation of immune system process
GOBP	390	0.151781134	0.24319519	0.338908344	negative regulation of immune system process
GOBP	929	0.13676334	0.229076148	0.327608114	positive regulation of immune system process
GOBP	194	0.153871228	0.248406982	0.349613564	regulation of leukocyte migration
GOBP	41	0.096243225	0.199809425	0.289777422	negative regulation of leukocyte migration
GOBP	135	0.174870549	0.265782057	0.364524914	positive regulation of leukocyte migration
GOBP	112	0.153517302	0.251495094	0.35303892	regulation of leukocyte chemotaxis
GOBP	15	0.039625432	0.145093167	0.254640557	negative regulation of leukocyte chemotaxis
GOBP	91	0.177773039	0.265540737	0.364513188	positive regulation of leukocyte chemotaxis
GOBP	34	0.154876911	0.259596575	0.365213241	regulation of cellular extravasation
GOBP	21	0.166045319	0.275897794	0.379548792	positive regulation of cellular extravasation
GOBP	498	0.148461771	0.240005707	0.336714104	regulation of leukocyte activation
GOBP	164	0.16157079	0.251545337	0.351171877	negative regulation of leukocyte activation
GOBP	311	0.152192128	0.246818115	0.346277467	positive regulation of leukocyte activation
GOBP	393	0.139038802	0.232803636	0.333767415	regulation of immune effector process
GOBP	111	0.187105857	0.282553475	0.376050388	negative regulation of immune effector process
GOBP	199	0.147286643	0.245691261	0.34802541	positive regulation of immune effector process
GOBP	128	0.138217129	0.235043819	0.342714314	regulation of production of molecular mediator of immune response
GOBP	33	0.199143598	0.278607656	0.372298915	negative regulation of production of molecular mediator of immune response
GOBP	85	0.116963367	0.217942486	0.339194845	positive regulation of production of molecular mediator of immune response
GOBP	189	0.154183753	0.247872454	0.347832884	regulation of leukocyte mediated immunity
GOBP	43	0.194249598	0.289166309	0.38147446	negative regulation of leukocyte mediated immunity
GOBP	124	0.153163477	0.244904512	0.348601789	positive regulation of leukocyte mediated immunity
GOBP	135	0.161100092	0.252604404	0.354921946	regulation of lymphocyte mediated immunity
GOBP	33	0.2019405	0.289843049	0.370322612	negative regulation of lymphocyte mediated immunity
GOBP	94	0.155104769	0.250447799	0.358460113	positive regulation of lymphocyte mediated immunity
GOBP	65	0.176322192	0.262806517	0.350660516	regulation of T cell mediated immunity
GOBP	14	0.204855564	0.29013114	0.37691014	negative regulation of T cell mediated immunity
GOBP	46	0.183244295	0.265009001	0.341814635	positive regulation of T cell mediated immunity
GOBP	47	0.144070827	0.231368028	0.359614631	regulation of B cell mediated immunity
GOBP	12	0.207122136	0.281870788	0.356467517	negative regulation of B cell mediated immunity
GOBP	31	0.108788642	0.20631063	0.331098811	positive regulation of B cell mediated immunity
GOBP	35	0.182373043	0.327341838	0.447547257	regulation of natural killer cell mediated immunity
GOBP	10	0.205519848	0.305213842	0.422647947	negative regulation of natural killer cell mediated immunity
GOBP	25	0.233189742	0.369707069	0.487727805	positive regulation of natural killer cell mediated immunity
GOBP	74	0.169682288	0.270207159	0.367914178	regulation of cytokine production involved in immune response
GOBP	21	0.203104158	0.283865564	0.377186294	negative regulation of cytokine production involved in immune response
GOBP	48	0.159474872	0.282436716	0.387989046	positive regulation of cytokine production involved in immune response
GOBP	28	0.201280226	0.289654543	0.386763268	regulation of T cell cytokine production
GOBP	19	0.212389408	0.316848669	0.409581656	positive regulation of T cell cytokine production
GOBP	10	0.196065555	0.293493684	0.398636381	regulation of dendritic cell cytokine production
GOBP	13	0.189370796	0.278348949	0.366790703	regulation of cytokine secretion involved in immune response
GOBP	63	0.268153932	0.369100455	0.473564813	cytoplasmic pattern recognition receptor signaling pathway
GOBP	32	0.182162417	0.313282624	0.492878839	MyD88-dependent toll-like receptor signaling pathway
GOBP	32	0.193350723	0.340836792	0.455711521	MyD88-independent toll-like receptor signaling pathway
GOBP	359	0.141933626	0.244393183	0.350827437	immune response-activating signal transduction
GOBP	106	0.155180558	0.259855062	0.382896507	innate immune response-activating signal transduction
GOBP	108	0.137008757	0.230864079	0.342731358	regulation of myeloid leukocyte differentiation
GOBP	42	0.136279168	0.220566648	0.326146933	negative regulation of myeloid leukocyte differentiation
GOBP	54	0.138782089	0.236252119	0.342470024	positive regulation of myeloid leukocyte differentiation
GOBP	389	0.143421133	0.245320703	0.351384538	immune response-regulating signaling pathway
GOBP	386	0.143371596	0.245847763	0.352398566	immune response-regulating cell surface receptor signaling pathway
GOBP	581	0.134451188	0.226105668	0.319578333	peptide secretion
GOBP	471	0.133499825	0.224455558	0.320165897	regulation of peptide secretion
GOBP	136	0.124366231	0.226459777	0.325090676	negative regulation of peptide secretion
GOBP	270	0.135124821	0.224415241	0.319518666	positive regulation of peptide secretion
GOBP	152	0.168097211	0.258568215	0.358826986	regulation of adaptive immune response
GOBP	43	0.231480654	0.323345955	0.400916487	negative regulation of adaptive immune response
GOBP	98	0.152487232	0.243325119	0.34910791	positive regulation of adaptive immune response
GOBP	137	0.168030879	0.258589075	0.358299918	regulation of adaptive immune response based on somatic recombination of immune receptors built from immunoglobulin superfamily domains
GOBP	38	0.226723942	0.312968024	0.398654963	negative regulation of adaptive immune response based on somatic recombination of immune receptors built from immunoglobulin superfamily domains
GOBP	93	0.153537868	0.244614133	0.351527387	positive regulation of adaptive immune response based on somatic recombination of immune receptors built from immunoglobulin superfamily domains
GOBP	27	0.342631526	0.405806685	0.490867528	regulation of T-helper 1 type immune response
GOBP	20	0.325714563	0.389642017	0.47331342	positive regulation of T-helper 1 type immune response
GOBP	30	0.234003472	0.327505054	0.405838805	regulation of type 2 immune response
GOBP	13	0.274084906	0.348630177	0.424260959	negative regulation of type 2 immune response
GOBP	16	0.163717244	0.28157346	0.40864487	positive regulation of type 2 immune response
GOBP	371	0.16237535	0.262071164	0.362839704	regulation of response to biotic stimulus
GOBP	81	0.156689079	0.266640709	0.372296962	negative regulation of response to biotic stimulus
GOBP	228	0.155644623	0.254288915	0.361341757	positive regulation of response to biotic stimulus
GOBP	16	0.174260466	0.250328348	0.383585433	regulation of response to tumor cell
GOBP	13	0.153692785	0.233148283	0.341743721	positive regulation of response to tumor cell
GOBP	16	0.174260466	0.250328348	0.383585433	regulation of immune response to tumor cell
GOBP	13	0.153692785	0.233148283	0.341743721	positive regulation of immune response to tumor cell
GOBP	24	0.142548819	0.212498378	0.306899184	regulation of inflammatory response to antigenic stimulus
GOBP	12	0.127173909	0.197527899	0.32249673	negative regulation of inflammatory response to antigenic stimulus
GOBP	10	0.169845875	0.224993633	0.290513333	positive regulation of inflammatory response to antigenic stimulus
GOBP	14	0.159085744	0.208670572	0.284847401	regulation of acute inflammatory response to antigenic stimulus
GOBP	55	0.155307818	0.258760643	0.363119362	regulation of myeloid leukocyte mediated immunity
GOBP	10	0.140997513	0.312242169	0.416988032	negative regulation of myeloid leukocyte mediated immunity
GOBP	31	0.16929838	0.256887106	0.355672442	positive regulation of myeloid leukocyte mediated immunity
GOBP	47	0.144070827	0.231368028	0.359614631	regulation of immunoglobulin mediated immune response
GOBP	12	0.207122136	0.281870788	0.356467517	negative regulation of immunoglobulin mediated immune response
GOBP	31	0.108788642	0.20631063	0.331098811	positive regulation of immunoglobulin mediated immune response
GOBP	17	0.166377607	0.28236324	0.38009032	regulation of B cell apoptotic process
GOBP	11	0.105562552	0.233981219	0.327975959	negative regulation of B cell apoptotic process
GOBP	85	0.144053742	0.226702887	0.340023026	regulation of humoral immune response
GOBP	13	0.200025133	0.317295824	0.410063775	negative regulation of humoral immune response
GOBP	13	0.124257381	0.2005445	0.269141021	positive regulation of humoral immune response
GOBP	10	0.20817141	0.257555723	0.368535313	regulation of humoral immune response mediated by circulating immunoglobulin
GOBP	53	0.161321944	0.244784372	0.338852815	response to ischemia
GOBP	10	0.197127521	0.276280902	0.445232248	desmosome organization
GOBP	339	0.253179119	0.379007412	0.507056666	regionalization
GOBP	880	0.168722513	0.264861912	0.361720248	developmental process involved in reproduction
GOBP	240	0.202961525	0.319534234	0.43636935	heart morphogenesis
GOBP	1683	0.147105833	0.241380055	0.336600953	system process
GOBP	39	0.224439792	0.315419668	0.447169012	skeletal muscle contraction
GOBP	417	0.168095914	0.270837446	0.376342406	muscle system process
GOBP	512	0.157044557	0.251112479	0.349920821	circulatory system process
GOBP	116	0.153547677	0.235917631	0.326069679	renal system process
GOBP	276	0.18621041	0.289130374	0.398628097	heart process
GOBP	32	0.251306881	0.326771185	0.420900145	respiratory system process
GOBP	155	0.15708427	0.253222454	0.354676274	vascular process in circulatory system
GOBP	44	0.175281492	0.275413615	0.388597412	regulation of systemic arterial blood pressure mediated by a chemical signal
GOBP	22	0.164941626	0.246577201	0.343425202	renal system process involved in regulation of systemic arterial blood pressure
GOBP	86	0.161534191	0.252380769	0.349039487	regulation of systemic arterial blood pressure
GOBP	21	0.131272314	0.225635362	0.324607083	regulation of systemic arterial blood pressure by renin-angiotensin
GOBP	10	0.149178775	0.265254117	0.389125158	positive regulation of systemic arterial blood pressure
GOBP	18	0.206510283	0.287538008	0.377712887	negative regulation of systemic arterial blood pressure
GOBP	36	0.221147499	0.3060723	0.411278011	renal water homeostasis
GOBP	11	0.196750319	0.264427713	0.333160502	regulation of glomerular filtration
GOBP	23	0.153225587	0.223807231	0.300179021	glomerular filtration
GOBP	17	0.391080322	0.482776181	0.573884579	heart field specification
GOBP	10	0.407742719	0.507439149	0.655293457	heart induction
GOBP	11	0.440735791	0.540701099	0.620534075	secondary heart field specification
GOBP	67	0.229755614	0.351256095	0.45884764	embryonic heart tube morphogenesis
GOBP	26	0.360417176	0.463990623	0.552203785	outflow tract septum morphogenesis
GOBP	10	0.409002459	0.501878717	0.566544148	membranous septum morphogenesis
GOBP	76	0.285462395	0.408641197	0.524048992	outflow tract morphogenesis
GOBP	34	0.367840557	0.469567896	0.575432569	regulation of animal organ formation
GOBP	11	0.337800913	0.421837135	0.528801006	endocardium development
GOBP	119	0.192287032	0.299194296	0.398323658	endothelium development
GOBP	16	0.161916896	0.270175994	0.371602619	morphogenesis of an endothelium
GOBP	13	0.33992647	0.436285189	0.525810852	cardiac conduction system development
GOBP	57	0.222197141	0.352773399	0.482821089	heart valve development
GOBP	25	0.303104509	0.454450944	0.546847213	atrioventricular valve development
GOBP	11	0.330349788	0.439113387	0.521196032	mitral valve development
GOBP	29	0.247213589	0.384329809	0.491241462	aortic valve development
GOBP	20	0.306178545	0.409687561	0.53004529	pulmonary valve development
GOBP	48	0.24860037	0.389284676	0.514917288	heart valve morphogenesis
GOBP	25	0.264644555	0.403930982	0.517921847	aortic valve morphogenesis
GOBP	23	0.305058819	0.464474655	0.557746541	atrioventricular valve morphogenesis
GOBP	10	0.363476239	0.467329888	0.553513861	mitral valve morphogenesis
GOBP	16	0.333031668	0.466275866	0.563513274	pulmonary valve morphogenesis
GOBP	14	0.179606322	0.339729119	0.54893284	heart valve formation
GOBP	46	0.313819974	0.448400356	0.547155516	endocardial cushion development
GOBP	19	0.326332389	0.494041809	0.568985648	epithelial to mesenchymal transition involved in endocardial cushion formation
GOBP	37	0.29642444	0.470313607	0.557393541	endocardial cushion morphogenesis
GOBP	161	0.217343041	0.32804927	0.441254978	cardiac chamber development
GOBP	120	0.225661697	0.348086358	0.467362347	cardiac chamber morphogenesis
GOBP	12	0.554954163	0.640723606	0.741237849	cardiac chamber formation
GOBP	71	0.232164541	0.350639727	0.481421756	cardiac ventricle morphogenesis
GOBP	28	0.181298525	0.371483233	0.509295344	cardiac atrium morphogenesis
GOBP	10	0.533061796	0.602618564	0.679888874	cardiac ventricle formation
GOBP	14	0.215725337	0.341755552	0.52148735	cardiac left ventricle morphogenesis
GOBP	20	0.390367177	0.492725948	0.595472957	cardiac right ventricle morphogenesis
GOBP	16	0.177298937	0.305946051	0.456502849	ventricular trabecula myocardium morphogenesis
GOBP	53	0.225834482	0.338531211	0.467449463	ventricular cardiac muscle tissue development
GOBP	34	0.161120448	0.332880449	0.483054829	cardiac atrium development
GOBP	123	0.21098561	0.324014013	0.445629999	cardiac ventricle development
GOBP	43	0.183744738	0.260693795	0.359346608	regulation of membrane depolarization
GOBP	26	0.393001198	0.499538459	0.566842501	endocardial cushion formation
GOBP	105	0.252177264	0.373097915	0.478870154	cardiac septum development
GOBP	70	0.244295985	0.374209104	0.48796228	ventricular septum development
GOBP	21	0.242190188	0.391652607	0.5092729	atrial septum development
GOBP	22	0.166943409	0.282594383	0.37326324	physiological muscle hypertrophy
GOBP	22	0.304335584	0.393231147	0.488626555	muscle hypertrophy in response to stress
GOBP	75	0.190245787	0.301608339	0.413496108	cardiac muscle hypertrophy
GOBP	22	0.166943409	0.282594383	0.37326324	physiological cardiac muscle hypertrophy
GOBP	12	0.271124361	0.406235897	0.555816285	Wnt signaling pathway involved in heart development
GOBP	22	0.224914793	0.347033126	0.455914186	type B pancreatic cell differentiation
GOBP	18	0.20615748	0.335080644	0.403106134	type B pancreatic cell development
GOBP	80	0.231075214	0.334206168	0.431710445	amino acid transmembrane transport
GOBP	12	0.278860476	0.395864882	0.535674785	mesenchymal to epithelial transition involved in metanephros morphogenesis
GOBP	31	0.2998887	0.404023988	0.550229681	metanephros morphogenesis
GOBP	68	0.163932112	0.293945769	0.420536995	cilium movement
GOBP	28	0.105649979	0.185711774	0.335729419	epithelial cilium movement involved in extracellular fluid movement
GOBP	14	0.150108538	0.335781983	0.488746218	regulation of cilium movement
GOBP	10	0.138385744	0.309634158	0.526319113	regulation of cilium beat frequency
GOBP	10	0.441085016	0.561042654	0.668118851	sphingosine-1-phosphate receptor signaling pathway
GOBP	29	0.146009072	0.280320673	0.373683418	epithelial cell morphogenesis
GOBP	29	0.303009312	0.422858868	0.532502054	axis elongation
GOBP	67	0.242268645	0.336117385	0.437679691	neural retina development
GOBP	29	0.133503116	0.274528455	0.416648047	chondrocyte differentiation involved in endochondral bone morphogenesis
GOBP	16	0.088231084	0.238636727	0.461100165	chondrocyte morphogenesis involved in endochondral bone morphogenesis
GOBP	41	0.1576191	0.272730389	0.40648807	endochondral bone growth
GOBP	33	0.130962036	0.238429965	0.387694034	growth plate cartilage development
GOBP	24	0.120313644	0.248251563	0.436927669	growth plate cartilage chondrocyte differentiation
GOBP	17	0.088231084	0.223400816	0.416120258	growth plate cartilage morphogenesis
GOBP	16	0.088231084	0.238636727	0.461100165	growth plate cartilage chondrocyte morphogenesis
GOBP	23	0.117501118	0.274332028	0.435974142	chondrocyte development involved in endochondral bone morphogenesis
GOBP	13	0.313311031	0.41817282	0.481816492	detection of calcium ion
GOBP	564	0.151269808	0.246497436	0.341385693	carbohydrate metabolic process
GOBP	98	0.149051191	0.253178689	0.352607468	polysaccharide metabolic process
GOBP	67	0.156764634	0.286636059	0.388140894	glycogen metabolic process
GOBP	42	0.153713735	0.287035003	0.392900478	glycogen biosynthetic process
GOBP	26	0.089826491	0.273664901	0.407606771	regulation of glycogen biosynthetic process
GOBP	22	0.181567005	0.331974282	0.448037359	glycogen catabolic process
GOBP	10	0.133556284	0.197773089	0.262403373	disaccharide metabolic process
GOBP	265	0.152013839	0.257302905	0.358847968	monosaccharide metabolic process
GOBP	12	0.42549992	0.511823265	0.584406608	fructose metabolic process
GOBP	16	0.360137387	0.438673392	0.567240952	fucose metabolic process
GOBP	191	0.144860672	0.260322116	0.367167134	glucose metabolic process
GOBP	30	0.141633104	0.348490056	0.497886918	glucose catabolic process
GOBP	13	0.262762104	0.377443608	0.479965363	galactose metabolic process
GOBP	11	0.250937486	0.342647929	0.441199836	inositol metabolic process
GOBP	153	0.183518906	0.296189074	0.40829363	aminoglycan metabolic process
GOBP	104	0.238590361	0.352406051	0.45495649	aminoglycan biosynthetic process
GOBP	102	0.237369342	0.35012945	0.455252511	glycosaminoglycan biosynthetic process
GOBP	60	0.167898615	0.282216442	0.407517381	aminoglycan catabolic process
GOBP	54	0.177698726	0.291080309	0.421805716	glycosaminoglycan catabolic process
GOBP	84	0.231376863	0.343257728	0.443602402	proteoglycan metabolic process
GOBP	37	0.13088017	0.243865019	0.347680345	amino sugar metabolic process
GOBP	15	0.162988627	0.280952966	0.449935779	N-acetylglucosamine metabolic process
GOBP	14	0.16393843	0.254122851	0.348448697	UDP-N-acetylglucosamine metabolic process
GOBP	10	0.077328508	0.135482698	0.27873806	N-acetylneuraminate metabolic process
GOBP	20	0.286046461	0.512544111	0.73062881	uronic acid metabolic process
GOBP	357	0.159312656	0.251701793	0.347816583	alcohol metabolic process
GOBP	21	0.388720886	0.473643011	0.575987083	ethanol metabolic process
GOBP	12	0.40509036	0.521087901	0.643198294	ethanol catabolic process
GOBP	12	0.408204546	0.547983707	0.655057292	ethanol oxidation
GOBP	18	0.233272908	0.337819817	0.431408592	glycerol metabolic process
GOBP	68	0.152842914	0.280356342	0.385658655	cellular glucan metabolic process
GOBP	58	0.162328336	0.276038772	0.389462297	cellular aldehyde metabolic process
GOBP	1033	0.137401088	0.236666969	0.335290433	organic acid metabolic process
GOBP	36	0.158114572	0.305289263	0.416870912	acetyl-CoA metabolic process
GOBP	21	0.180933557	0.370787732	0.455935983	acetyl-CoA biosynthetic process
GOBP	15	0.301539495	0.406567935	0.50023024	acetyl-CoA biosynthetic process from pyruvate
GOBP	17	0.168249558	0.276220532	0.380662781	lactate metabolic process
GOBP	134	0.170496657	0.282112372	0.406381696	pyruvate metabolic process
GOBP	467	0.139782228	0.242843556	0.350533433	generation of precursor metabolites and energy
GOBP	80	0.165579146	0.283209811	0.395314269	gluconeogenesis
GOBP	102	0.188162629	0.290396439	0.421128805	glycolytic process
GOBP	13	0.104048675	0.181160664	0.304134784	pentose-phosphate shunt
GOBP	31	0.235889312	0.391778657	0.504594225	tricarboxylic acid cycle
GOBP	16	0.145569374	0.26594085	0.39260706	2-oxoglutarate metabolic process
GOBP	187	0.143988216	0.245436261	0.352554862	regulation of carbohydrate metabolic process
GOBP	70	0.180219158	0.284261659	0.420801315	regulation of glycolytic process
GOBP	43	0.158551305	0.289210761	0.40281414	regulation of gluconeogenesis
GOBP	79	0.143641257	0.265567219	0.37068841	energy reserve metabolic process
GOBP	119	0.182151031	0.305975561	0.442578773	oxidative phosphorylation
GOBP	51	0.216815663	0.343302867	0.510375016	mitochondrial electron transport, NADH to ubiquinone
GOBP	13	0.253211888	0.369263573	0.524267913	mitochondrial electron transport, ubiquinol to cytochrome c
GOBP	20	0.206813231	0.399682131	0.590971606	mitochondrial electron transport, cytochrome c to oxygen
GOBP	104	0.139369102	0.241674966	0.359267985	regulation of nucleotide metabolic process
GOBP	22	0.139853328	0.236607398	0.366295944	purine nucleobase metabolic process
GOBP	381	0.144240376	0.242876297	0.343798426	purine nucleotide metabolic process
GOBP	160	0.151649524	0.248920044	0.349358847	purine nucleotide biosynthetic process
GOBP	119	0.184407071	0.280773512	0.396422714	nucleoside diphosphate phosphorylation
GOBP	10	0.522640428	0.639795068	0.715108926	cAMP biosynthetic process
GOBP	10	0.24928837	0.342613653	0.392628616	GTP biosynthetic process
GOBP	10	0.192227255	0.434138545	0.535433872	IMP biosynthetic process
GOBP	43	0.149002861	0.252713153	0.371548289	purine nucleotide catabolic process
GOBP	18	0.174400891	0.273094731	0.382519063	pyrimidine nucleobase metabolic process
GOBP	33	0.13793131	0.254209948	0.35989786	pyrimidine nucleoside metabolic process
GOBP	12	0.118224451	0.470709745	0.636038384	cytidine catabolic process
GOBP	56	0.179633291	0.278947458	0.38298745	pyrimidine nucleotide metabolic process
GOBP	40	0.193165664	0.290819448	0.385208959	pyrimidine nucleotide biosynthetic process
GOBP	13	0.258845688	0.345435662	0.449539313	CTP biosynthetic process
GOBP	13	0.155194147	0.326945769	0.557649591	pyrimidine nucleotide catabolic process
GOBP	841	0.189130315	0.304183963	0.416761227	DNA metabolic process
GOBP	260	0.190808771	0.337407982	0.460838247	DNA replication
GOBP	145	0.249980986	0.383708678	0.491703339	DNA-dependent DNA replication
GOBP	13	0.257990593	0.368626535	0.44863621	mitochondrial DNA replication
GOBP	16	0.201715752	0.427481996	0.549746002	DNA ligation
GOBP	13	0.428517878	0.510732065	0.585038754	DNA unwinding involved in DNA replication
GOBP	39	0.283999308	0.416770695	0.552052375	DNA replication initiation
GOBP	17	0.200290465	0.431609401	0.549636068	DNA strand elongation involved in DNA replication
GOBP	103	0.141878694	0.282325437	0.422760116	regulation of DNA replication
GOBP	67	0.26191799	0.370039004	0.485980128	RNA-dependent DNA biosynthetic process
GOBP	505	0.216113295	0.345064412	0.457965153	DNA repair
GOBP	116	0.193320214	0.317822215	0.424993641	regulation of DNA repair
GOBP	69	0.254016926	0.36917276	0.479522635	transcription-coupled nucleotide-excision repair
GOBP	40	0.17604386	0.349977195	0.493668037	base-excision repair
GOBP	10	0.29938059	0.559145026	0.65049057	base-excision repair, AP site formation
GOBP	108	0.243242294	0.360774711	0.477390541	nucleotide-excision repair
GOBP	10	0.261822928	0.340430696	0.477745671	pyrimidine dimer repair
GOBP	20	0.338462894	0.432609604	0.536021906	nucleotide-excision repair, preincision complex stabilization
GOBP	28	0.320148765	0.415994226	0.505484576	nucleotide-excision repair, preincision complex assembly
GOBP	21	0.288802984	0.422450345	0.521778687	nucleotide-excision repair, DNA incision, 3'-to lesion
GOBP	36	0.29192087	0.416271883	0.502711256	nucleotide-excision repair, DNA incision, 5'-to lesion
GOBP	22	0.253661117	0.381752264	0.507316057	nucleotide-excision repair, DNA gap filling
GOBP	31	0.297274271	0.379442259	0.480705992	mismatch repair
GOBP	50	0.291353318	0.385168067	0.489671251	postreplication repair
GOBP	225	0.224920136	0.372335774	0.490393845	double-strand break repair
GOBP	78	0.175982139	0.369704759	0.497890107	double-strand break repair via nonhomologous end joining
GOBP	107	0.205106624	0.321368263	0.432221004	DNA modification
GOBP	62	0.247911535	0.366286632	0.505897121	DNA alkylation
GOBP	62	0.247911535	0.366286632	0.505897121	DNA methylation
GOBP	39	0.152090281	0.269823718	0.369960443	DNA catabolic process
GOBP	24	0.157440835	0.289847035	0.375282474	apoptotic DNA fragmentation
GOBP	256	0.180171285	0.320074126	0.458264048	DNA recombination
GOBP	22	0.282396098	0.452012037	0.61232422	mitotic recombination
GOBP	130	0.180578066	0.320968948	0.43832518	DNA packaging
GOBP	659	0.233858101	0.361122664	0.473136005	chromatin organization
GOBP	113	0.203525053	0.343690114	0.464101347	chromatin assembly or disassembly
GOBP	67	0.241947871	0.372802858	0.489641375	nucleosome assembly
GOBP	36	0.379516025	0.473801605	0.568640395	DNA replication-independent nucleosome assembly
GOBP	17	0.245762898	0.422175157	0.583537094	nucleosome disassembly
GOBP	152	0.26699339	0.390517155	0.504952398	chromatin remodeling
GOBP	62	0.317698376	0.428493626	0.544334652	chromatin silencing
GOBP	19	0.359202362	0.490820283	0.587866198	DNA methylation-dependent heterochromatin assembly
GOBP	19	0.282796669	0.400030559	0.520553024	regulation of gene expression by genetic imprinting
GOBP	2987	0.180054937	0.288966694	0.39343668	transcription, DNA-templated
GOBP	225	0.201993333	0.309816399	0.422215653	DNA-templated transcription, initiation
GOBP	70	0.246960525	0.358072028	0.458468706	DNA-templated transcription, termination
GOBP	104	0.256655406	0.380874743	0.476522763	DNA-templated transcription, elongation
GOBP	2841	0.181799886	0.291772504	0.397045332	regulation of transcription, DNA-templated
GOBP	28	0.24195496	0.32010506	0.429193503	regulation of transcription by RNA polymerase I
GOBP	2019	0.1904285	0.305170364	0.414469705	regulation of transcription by RNA polymerase II
GOBP	21	0.186093179	0.319151784	0.402336679	regulation of transcription by RNA polymerase III
GOBP	58	0.241821771	0.344085996	0.444656966	transcription by RNA polymerase I
GOBP	34	0.262731112	0.384772204	0.488038579	transcription initiation from RNA polymerase I promoter
GOBP	29	0.27870587	0.392765324	0.483255106	transcription elongation from RNA polymerase I promoter
GOBP	29	0.265050223	0.377950344	0.482450255	termination of RNA polymerase I transcription
GOBP	190	0.239793658	0.347970951	0.439533559	rRNA processing
GOBP	2146	0.188188849	0.301154356	0.40948525	transcription by RNA polymerase II
GOBP	181	0.217069846	0.321637195	0.43200893	transcription initiation from RNA polymerase II promoter
GOBP	76	0.230626055	0.386973791	0.485570783	transcription elongation from RNA polymerase II promoter
GOBP	34	0.208660721	0.349614513	0.475333252	termination of RNA polymerase II transcription
GOBP	31	0.188236429	0.401498568	0.543173724	7-methylguanosine mRNA capping
GOBP	30	0.194061116	0.343736878	0.464972697	mRNA splice site selection
GOBP	42	0.250375504	0.394606842	0.519146778	mRNA polyadenylation
GOBP	24	0.338329005	0.443126588	0.557337914	mRNA cleavage
GOBP	42	0.187290379	0.305099043	0.400987627	transcription by RNA polymerase III
GOBP	10	0.132363287	0.260418331	0.346223195	transcription initiation from RNA polymerase III promoter
GOBP	14	0.06310674	0.3016263	0.433536694	tRNA splicing, via endonucleolytic cleavage and ligation
GOBP	15	0.246433238	0.421079095	0.57973795	mitochondrial transcription
GOBP	813	0.195917553	0.314110372	0.417243578	RNA processing
GOBP	458	0.203602443	0.33339076	0.441801641	mRNA processing
GOBP	140	0.201242606	0.321572081	0.421501292	tRNA metabolic process
GOBP	69	0.244216653	0.375278483	0.480170587	tRNA modification
GOBP	389	0.17281687	0.287665751	0.404222803	RNA catabolic process
GOBP	352	0.174091719	0.289282179	0.406379377	mRNA catabolic process
GOBP	213	0.224999443	0.367233785	0.481007081	RNA localization
GOBP	131	0.284730051	0.41989397	0.525473931	RNA export from nucleus
GOBP	105	0.313313134	0.450534199	0.544093649	mRNA export from nucleus
GOBP	29	0.416138436	0.546360701	0.655077051	tRNA export from nucleus
GOBP	546	0.179697532	0.282821541	0.3866076	translation
GOBP	183	0.207838313	0.342262949	0.466352788	translational initiation
GOBP	94	0.199036886	0.30784645	0.406266433	translational elongation
GOBP	69	0.233546808	0.320493756	0.411814896	translational termination
GOBP	334	0.188054	0.302959141	0.412856323	regulation of translation
GOBP	23	0.224393502	0.348237658	0.479967627	tRNA aminoacylation for protein translation
GOBP	75	0.178648478	0.314915959	0.438691613	regulation of translational initiation
GOBP	15	0.263055547	0.380899551	0.45676996	regulation of translational elongation
GOBP	12	0.148872698	0.20495466	0.330014865	regulation of translational fidelity
GOBP	204	0.191095718	0.295948452	0.391225038	protein folding
GOBP	35	0.252292268	0.351372096	0.434756045	'de novo' protein folding
GOBP	10	0.184466163	0.312890971	0.365623929	signal peptide processing
GOBP	1826	0.159866308	0.260482665	0.364227768	protein phosphorylation
GOBP	212	0.181479564	0.293118917	0.407712426	negative regulation of protein kinase activity
GOBP	287	0.227079102	0.338465677	0.440368879	protein dephosphorylation
GOBP	34	0.233783431	0.340560138	0.445787853	protein ADP-ribosylation
GOBP	183	0.210365765	0.322114805	0.433801199	protein acetylation
GOBP	14	0.159501566	0.257524145	0.349366138	N-terminal protein amino acid acetylation
GOBP	154	0.206075145	0.326774557	0.444560972	internal protein amino acid acetylation
GOBP	91	0.212168482	0.354736834	0.486264156	protein deacetylation
GOBP	148	0.234422901	0.372798067	0.491383479	protein methylation
GOBP	32	0.436994429	0.597000941	0.710375373	protein demethylation
GOBP	225	0.197050847	0.306071152	0.405960119	protein glycosylation
GOBP	72	0.19478684	0.338301971	0.445333483	protein N-linked glycosylation
GOBP	19	0.181026937	0.361600046	0.516397638	dolichol-linked oligosaccharide biosynthetic process
GOBP	20	0.208466068	0.368745727	0.544304732	oligosaccharide-lipid intermediate biosynthetic process
GOBP	16	0.188205315	0.311478137	0.412185641	N-glycan processing
GOBP	100	0.20854786	0.313723095	0.413067681	protein O-linked glycosylation
GOBP	76	0.236940849	0.341242907	0.432812965	protein lipidation
GOBP	31	0.293854464	0.433268687	0.517464903	GPI anchor metabolic process
GOBP	30	0.309906198	0.45020164	0.520712392	GPI anchor biosynthetic process
GOBP	1571	0.1444254	0.250493969	0.357272436	proteolysis
GOBP	44	0.139093516	0.248032295	0.368889521	membrane protein ectodomain proteolysis
GOBP	568	0.23056625	0.351536352	0.45976114	ubiquitin-dependent protein catabolic process
GOBP	67	0.299851328	0.407122582	0.518695814	protein monoubiquitination
GOBP	26	0.201596129	0.326160726	0.430377695	protein quality control for misfolded or incompletely synthesized proteins
GOBP	21	0.194150169	0.296970253	0.436167127	glycoprotein catabolic process
GOBP	27	0.207174197	0.338678	0.462779759	protein deglycosylation
GOBP	692	0.153732706	0.250411087	0.351512838	peptide metabolic process
GOBP	276	0.113150311	0.212253153	0.317106637	cellular amino acid metabolic process
GOBP	59	0.145615956	0.264684036	0.416758848	regulation of cellular amino acid metabolic process
GOBP	17	0.122725103	0.209582151	0.341355123	arginine metabolic process
GOBP	11	0.094917691	0.214232499	0.375943647	cysteine metabolic process
GOBP	29	0.173989435	0.270141365	0.420553502	glutamate metabolic process
GOBP	18	0.140448452	0.224487677	0.341577021	glutamine metabolic process
GOBP	13	0.07579985	0.232554421	0.334027468	glycine metabolic process
GOBP	11	0.152201772	0.196690153	0.296484587	lysine metabolic process
GOBP	10	0.173422834	0.208556636	0.347936565	lysine catabolic process
GOBP	15	0.133730654	0.270186255	0.374771845	methionine metabolic process
GOBP	11	0.033668609	0.098737593	0.239932336	L-serine metabolic process
GOBP	12	0.254574424	0.393969262	0.506267995	tryptophan metabolic process
GOBP	10	0.287415122	0.457134831	0.539920542	tryptophan catabolic process
GOBP	171	0.188914395	0.283784433	0.371876401	cellular modified amino acid metabolic process
GOBP	51	0.175564626	0.277109192	0.372184193	cellular biogenic amine metabolic process
GOBP	18	0.27868258	0.381437368	0.471227163	amino-acid betaine metabolic process
GOBP	19	0.120590691	0.208518242	0.296142264	melanin metabolic process
GOBP	50	0.139505936	0.221285639	0.325897939	catecholamine metabolic process
GOBP	16	0.275784943	0.369147157	0.489481318	indolalkylamine metabolic process
GOBP	20	0.122282959	0.275104322	0.39904142	thyroid hormone generation
GOBP	16	0.192159909	0.3152447	0.422939702	polyamine metabolic process
GOBP	12	0.235350213	0.334925522	0.488464005	polyamine biosynthetic process
GOBP	394	0.159465139	0.258372152	0.36029761	protein targeting
GOBP	126	0.171585415	0.268507394	0.378978719	protein import into nucleus
GOBP	14	0.348118635	0.472037176	0.587105945	NLS-bearing protein import into nucleus
GOBP	169	0.237008607	0.357880286	0.472389602	protein export from nucleus
GOBP	179	0.162601891	0.267235732	0.398494886	protein targeting to membrane
GOBP	97	0.283679904	0.437195766	0.606285408	cotranslational protein targeting to membrane
GOBP	93	0.30890341	0.463641429	0.618267373	SRP-dependent cotranslational protein targeting to membrane
GOBP	10	0.342099099	0.402708917	0.509373385	posttranslational protein targeting to endoplasmic reticulum membrane
GOBP	19	0.241264105	0.344019723	0.440413327	protein targeting to lysosome
GOBP	35	0.295793372	0.390916866	0.496389019	protein targeting to vacuole
GOBP	67	0.152312633	0.265914965	0.388026245	protein targeting to peroxisome
GOBP	89	0.203725898	0.305020869	0.401230857	protein targeting to mitochondrion
GOBP	1294	0.150463137	0.247587379	0.342298783	lipid metabolic process
GOBP	354	0.154479601	0.25877416	0.371914629	fatty acid metabolic process
GOBP	147	0.142723485	0.243099296	0.359111554	fatty acid biosynthetic process
GOBP	68	0.165362614	0.311585024	0.461123346	fatty acid beta-oxidation
GOBP	51	0.186840272	0.312617691	0.438794522	unsaturated fatty acid biosynthetic process
GOBP	97	0.148990337	0.268809655	0.399706474	acyl-CoA metabolic process
GOBP	120	0.194177594	0.304888554	0.414501632	neutral lipid metabolic process
GOBP	120	0.194177594	0.304888554	0.414501632	acylglycerol metabolic process
GOBP	97	0.195359123	0.316022991	0.436855972	triglyceride metabolic process
GOBP	190	0.188088368	0.293724579	0.382276487	membrane lipid metabolic process
GOBP	397	0.179447	0.281388583	0.375033289	phospholipid metabolic process
GOBP	14	0.081822344	0.321268028	0.399239746	phosphatidylethanolamine biosynthetic process
GOBP	296	0.20563028	0.304871494	0.393914266	glycerophospholipid metabolic process
GOBP	43	0.310754517	0.394272245	0.470668074	phosphatidic acid biosynthetic process
GOBP	36	0.217633315	0.32669145	0.428646756	phosphatidylcholine biosynthetic process
GOBP	30	0.281617078	0.373448486	0.443069855	phosphatidylserine metabolic process
GOBP	111	0.246132364	0.359390604	0.458185304	phosphatidylinositol biosynthetic process
GOBP	10	0.166066804	0.21433049	0.292368336	glycerol ether metabolic process
GOBP	97	0.191149427	0.312316718	0.409371543	glycolipid metabolic process
GOBP	146	0.181098199	0.290918516	0.383879772	sphingolipid metabolic process
GOBP	15	0.34197927	0.410848895	0.482743285	sphingosine metabolic process
GOBP	86	0.20338634	0.317255524	0.421429096	ceramide metabolic process
GOBP	14	0.19078512	0.313620482	0.401633339	glycosylceramide metabolic process
GOBP	13	0.283246442	0.357704178	0.431342473	sphingomyelin metabolic process
GOBP	57	0.169899193	0.296502559	0.403077671	glycosphingolipid metabolic process
GOBP	22	0.243936398	0.379821748	0.484813701	glycosphingolipid biosynthetic process
GOBP	107	0.195089333	0.305602465	0.426564018	icosanoid metabolic process
GOBP	30	0.220688539	0.346375139	0.472839615	leukotriene metabolic process
GOBP	43	0.171075369	0.265410266	0.373464598	prostanoid metabolic process
GOBP	43	0.171075369	0.265410266	0.373464598	prostaglandin metabolic process
GOBP	183	0.14964848	0.247851907	0.354830948	steroid biosynthetic process
GOBP	66	0.172805876	0.276188472	0.401485698	cholesterol biosynthetic process
GOBP	33	0.16278594	0.304213123	0.422126418	bile acid biosynthetic process
GOBP	26	0.116226543	0.202606679	0.298827553	C21-steroid hormone biosynthetic process
GOBP	11	0.340873017	0.439174644	0.729408273	androgen biosynthetic process
GOBP	11	0.216623194	0.276781191	0.451147155	estrogen biosynthetic process
GOBP	19	0.200766057	0.333446263	0.573976937	glucocorticoid biosynthetic process
GOBP	13	0.202642754	0.309608679	0.509808702	mineralocorticoid biosynthetic process
GOBP	24	0.112618798	0.201420984	0.392394446	steroid catabolic process
GOBP	11	0.144553151	0.229990225	0.377970694	cholesterol catabolic process
GOBP	138	0.138497473	0.246233131	0.362835845	isoprenoid metabolic process
GOBP	119	0.152879405	0.255522157	0.375882247	terpenoid metabolic process
GOBP	36	0.093581808	0.207685812	0.39853641	one-carbon metabolic process
GOBP	245	0.156668752	0.269537901	0.368613733	coenzyme metabolic process
GOBP	50	0.187208459	0.312356962	0.39684903	oxidoreduction coenzyme metabolic process
GOBP	34	0.256869475	0.400084736	0.528877511	NADH metabolic process
GOBP	22	0.298940479	0.445629823	0.5981456	NADH regeneration
GOBP	28	0.106202902	0.201330053	0.333348196	NADP metabolic process
GOBP	15	0.102327086	0.164662299	0.305748773	NADPH regeneration
GOBP	16	0.304260134	0.510674591	0.644941415	ubiquinone metabolic process
GOBP	14	0.418791639	0.575778387	0.696902351	ubiquinone biosynthetic process
GOBP	46	0.225923342	0.336775728	0.441490209	glutathione metabolic process
GOBP	15	0.232648486	0.347598976	0.433625866	glutathione biosynthetic process
GOBP	482	0.147970047	0.246409106	0.342580945	nucleoside phosphate metabolic process
GOBP	30	0.14868299	0.250053459	0.347246641	ATP biosynthetic process
GOBP	103	0.186174704	0.288698174	0.418776836	ATP generation from ADP
GOBP	27	0.239091887	0.385796898	0.498680107	folic acid-containing compound metabolic process
GOBP	134	0.15000806	0.250935381	0.355536821	vitamin metabolic process
GOBP	85	0.138835204	0.253719368	0.359669657	water-soluble vitamin metabolic process
GOBP	46	0.199158155	0.297291984	0.413539412	fat-soluble vitamin metabolic process
GOBP	38	0.187220777	0.291553688	0.401939863	porphyrin-containing compound metabolic process
GOBP	26	0.207794197	0.304909092	0.453327899	porphyrin-containing compound biosynthetic process
GOBP	22	0.199579752	0.314570321	0.456013271	heme biosynthetic process
GOBP	338	0.150785564	0.25328862	0.352222867	sulfur compound metabolic process
GOBP	2992	0.145865707	0.243891482	0.34154448	phosphate-containing compound metabolic process
GOBP	63	0.135471156	0.238097705	0.348426901	superoxide metabolic process
GOBP	115	0.213415474	0.355874559	0.494792244	xenobiotic metabolic process
GOBP	63	0.151326202	0.242219429	0.333245368	nitric oxide biosynthetic process
GOBP	1522	0.155686554	0.252220803	0.347482629	ion transport
GOBP	1054	0.159276582	0.258654364	0.357375353	cation transport
GOBP	219	0.237770048	0.357755298	0.478361872	potassium ion transport
GOBP	209	0.21051757	0.324799768	0.430095666	sodium ion transport
GOBP	396	0.151814806	0.251260335	0.354827726	calcium ion transport
GOBP	24	0.206064416	0.289070393	0.372156332	phosphate ion transport
GOBP	594	0.165729046	0.263404719	0.359478318	anion transport
GOBP	105	0.227664891	0.322404371	0.429149746	chloride transport
GOBP	16	0.202887469	0.349616942	0.509345679	copper ion transport
GOBP	69	0.163017842	0.2593872	0.365477235	iron ion transport
GOBP	15	0.297610045	0.404544797	0.520082225	manganese ion transport
GOBP	27	0.418368334	0.509427228	0.596642957	zinc ion transport
GOBP	20	0.290060118	0.381984884	0.520055876	water transport
GOBP	97	0.178698119	0.273683385	0.374249173	dicarboxylic acid transport
GOBP	268	0.180963793	0.281919857	0.383156936	neurotransmitter transport
GOBP	16	0.174980549	0.290108208	0.391854785	serotonin transport
GOBP	221	0.16292043	0.265560531	0.362881004	mitochondrial transport
GOBP	23	0.146450816	0.255515815	0.370134848	mitochondrial calcium ion transmembrane transport
GOBP	11	0.326892486	0.483556334	0.580956775	carnitine shuttle
GOBP	69	0.221903809	0.315351711	0.404882074	drug transmembrane transport
GOBP	12	0.209768249	0.367320835	0.534505308	oligopeptide transport
GOBP	31	0.11096578	0.19558042	0.344931766	extracellular transport
GOBP	36	0.134775657	0.229678142	0.323942006	nucleotide transport
GOBP	140	0.179013522	0.274861452	0.377057129	amino acid transport
GOBP	330	0.155664612	0.25521963	0.357230122	lipid transport
GOBP	636	0.146099872	0.235178718	0.328642172	cellular ion homeostasis
GOBP	439	0.145548039	0.237116982	0.334970941	cellular calcium ion homeostasis
GOBP	556	0.144126645	0.231908578	0.325270052	cellular metal ion homeostasis
GOBP	13	0.165145073	0.3109968	0.489090622	cellular copper ion homeostasis
GOBP	61	0.189626671	0.280992641	0.382515254	cellular iron ion homeostasis
GOBP	34	0.260734368	0.411761301	0.531366108	cellular zinc ion homeostasis
GOBP	15	0.26278864	0.411880332	0.541883879	cellular sodium ion homeostasis
GOBP	28	0.21413018	0.326611237	0.425896542	cell volume homeostasis
GOBP	92	0.180742967	0.296379658	0.402329171	regulation of pH
GOBP	1080	0.17734798	0.283207128	0.387574743	intracellular protein transport
GOBP	824	0.139236336	0.237629881	0.339552757	exocytosis
GOBP	186	0.185638466	0.304891133	0.406319878	endoplasmic reticulum to Golgi vesicle-mediated transport
GOBP	79	0.272170068	0.376862702	0.473033541	retrograde vesicle-mediated transport, Golgi to endoplasmic reticulum
GOBP	29	0.274786788	0.380744582	0.482339154	intra-Golgi vesicle-mediated transport
GOBP	95	0.254322495	0.374349072	0.480446427	post-Golgi vesicle-mediated transport
GOBP	58	0.251264202	0.362900296	0.458947596	Golgi to plasma membrane transport
GOBP	14	0.176051922	0.29640368	0.407891937	Golgi to endosome transport
GOBP	14	0.319045907	0.409634443	0.5136838	Golgi to vacuole transport
GOBP	547	0.153590315	0.253474736	0.358879553	endocytosis
GOBP	263	0.148654385	0.245714239	0.348967417	receptor-mediated endocytosis
GOBP	101	0.223026946	0.338428468	0.439457947	vesicle budding from membrane
GOBP	64	0.215990134	0.336076913	0.448296814	vesicle coating
GOBP	85	0.227637681	0.347280649	0.457652532	vesicle targeting
GOBP	42	0.276579828	0.408540184	0.524740507	vesicle docking involved in exocytosis
GOBP	97	0.248899834	0.363762097	0.480571314	vesicle fusion
GOBP	24	0.180696648	0.282410013	0.391961734	pinocytosis
GOBP	278	0.149706807	0.245269116	0.350605897	phagocytosis
GOBP	36	0.181942272	0.297852209	0.475542418	phagocytosis, recognition
GOBP	67	0.156254582	0.253267542	0.375929106	phagocytosis, engulfment
GOBP	315	0.196989281	0.30600754	0.416989929	nucleocytoplasmic transport
GOBP	488	0.207045654	0.312545057	0.413610245	autophagy
GOBP	1765	0.152862006	0.252351059	0.354465243	apoptotic process
GOBP	82	0.132745498	0.214837487	0.316069412	activation of cysteine-type endopeptidase activity involved in apoptotic process
GOBP	34	0.171256872	0.283602698	0.373453116	cellular component disassembly involved in execution phase of apoptosis
GOBP	22	0.16470452	0.262499553	0.345637435	inflammatory cell apoptotic process
GOBP	1959	0.152761412	0.253241953	0.35498267	movement of cell or subcellular component
GOBP	24	0.296429903	0.431588185	0.513107531	substrate-dependent cell migration
GOBP	10	0.394203614	0.483140663	0.546235918	substrate-dependent cell migration, cell extension
GOBP	593	0.160919997	0.258370779	0.360898162	chemotaxis
GOBP	335	0.174443603	0.279094921	0.386524923	muscle contraction
GOBP	153	0.179923725	0.289191863	0.394258621	regulation of muscle contraction
GOBP	101	0.185684914	0.28727673	0.393621369	smooth muscle contraction
GOBP	59	0.162841136	0.280391666	0.3967916	regulation of smooth muscle contraction
GOBP	165	0.215171434	0.3231375	0.42825665	striated muscle contraction
GOBP	86	0.23807887	0.341570516	0.432474096	regulation of striated muscle contraction
GOBP	56	0.108698142	0.21103153	0.308873399	syncytium formation
GOBP	1495	0.138261879	0.227144013	0.320685012	defense response
GOBP	42	0.108689785	0.213141192	0.323042832	acute-phase response
GOBP	693	0.136500062	0.225829035	0.322016336	inflammatory response
GOBP	1816	0.137302633	0.230572355	0.32608941	immune response
GOBP	90	0.159179622	0.261057622	0.385144315	complement activation
GOBP	14	0.191913284	0.306813817	0.419970664	complement activation, alternative pathway
GOBP	57	0.184104895	0.293471771	0.438676562	complement activation, classical pathway
GOBP	253	0.128164046	0.207250714	0.300176157	humoral immune response
GOBP	49	0.190438238	0.28109544	0.381647407	cellular defense response
GOBP	84	0.141710463	0.230056656	0.324428879	response to osmotic stress
GOBP	10	0.12549959	0.277100425	0.390711034	hypotonic response
GOBP	25	0.14519332	0.226276537	0.333103221	hyperosmotic response
GOBP	785	0.208019235	0.325501409	0.433799166	cellular response to DNA damage stimulus
GOBP	55	0.224394928	0.355903671	0.467416948	DNA damage response, signal transduction by p53 class mediator resulting in cell cycle arrest
GOBP	17	0.279175777	0.394496662	0.501449152	DNA damage response, signal transduction by p53 class mediator resulting in transcription of p21 class mediator
GOBP	417	0.140165774	0.237282644	0.331744632	response to oxidative stress
GOBP	12	0.143932275	0.264826603	0.375531111	ER overload response
GOBP	47	0.177150105	0.271372129	0.367923895	ER-nucleus signaling pathway
GOBP	166	0.182453693	0.28309808	0.383620544	response to unfolded protein
GOBP	12	0.197348964	0.296019115	0.48506654	response to sterol depletion
GOBP	12	0.332370963	0.467888646	0.612734575	cellular response to nitrogen starvation
GOBP	128	0.209005541	0.325873649	0.428203377	nucleus organization
GOBP	51	0.204907707	0.320899336	0.428621922	nuclear envelope organization
GOBP	14	0.269529233	0.500093277	0.683651603	nuclear pore organization
GOBP	65	0.267685934	0.381533122	0.492315477	telomere maintenance via telomerase
GOBP	483	0.169802317	0.270118224	0.369255192	mitochondrion organization
GOBP	105	0.153617999	0.261665809	0.36805734	mitochondrial membrane organization
GOBP	30	0.204475988	0.315241276	0.428113896	inner mitochondrial membrane organization
GOBP	97	0.195302941	0.297852413	0.395754732	plasma membrane organization
GOBP	1245	0.170915986	0.287070604	0.394971469	cytoskeleton organization
GOBP	385	0.191879872	0.316997912	0.431930279	actin filament organization
GOBP	698	0.193003322	0.305670504	0.410691004	microtubule-based process
GOBP	259	0.205864357	0.329752937	0.439778233	microtubule-based movement
GOBP	43	0.199069774	0.299661935	0.438071513	microtubule depolymerization
GOBP	29	0.229699092	0.360087313	0.492968973	microtubule nucleation
GOBP	26	0.223061335	0.312084443	0.41848958	negative regulation of microtubule depolymerization
GOBP	11	0.218306807	0.303983416	0.366408213	cytoplasm organization
GOBP	59	0.133670411	0.266320208	0.396655253	endoplasmic reticulum organization
GOBP	118	0.231891845	0.345460038	0.461934502	Golgi organization
GOBP	77	0.152117202	0.270040995	0.393615454	peroxisome organization
GOBP	72	0.328571219	0.44060152	0.546270032	endosome organization
GOBP	157	0.237073759	0.348246788	0.450039526	vacuole organization
GOBP	135	0.259602866	0.369678538	0.484074382	vacuolar transport
GOBP	21	0.241782431	0.324486753	0.412738748	vacuolar acidification
GOBP	16	0.228333448	0.331143913	0.450952522	protein catabolic process in the vacuole
GOBP	58	0.207721803	0.310242671	0.411483935	lysosome organization
GOBP	99	0.232618421	0.3447852	0.459718618	lysosomal transport
GOBP	142	0.208272073	0.317586005	0.432965041	cell-cell junction assembly
GOBP	96	0.177300258	0.290539713	0.414060327	cell-substrate junction assembly
GOBP	1699	0.193881569	0.306175905	0.410745657	cell cycle
GOBP	219	0.199604975	0.310345276	0.414922427	cell cycle arrest
GOBP	161	0.218839438	0.347359632	0.465982932	spindle organization
GOBP	104	0.23371646	0.363311679	0.489573806	mitotic spindle organization
GOBP	304	0.246348125	0.380802293	0.4896663	chromosome segregation
GOBP	54	0.244320319	0.389106768	0.508792381	sister chromatid cohesion
GOBP	20	0.240553091	0.366301937	0.484511602	regulation of sister chromatid cohesion
GOBP	21	0.304763313	0.412164873	0.516720151	mitotic sister chromatid cohesion
GOBP	15	0.247541538	0.420731473	0.510381359	mitotic chromosome condensation
GOBP	12	0.322939303	0.435650894	0.568268012	mitotic nuclear envelope disassembly
GOBP	47	0.318741668	0.458670727	0.558350404	mitotic metaphase plate congression
GOBP	10	0.111992028	0.278106646	0.346132768	mitotic nuclear envelope reassembly
GOBP	154	0.165338418	0.305183711	0.454762447	regulation of mitotic nuclear division
GOBP	56	0.289130768	0.439455731	0.580484857	metaphase/anaphase transition of mitotic cell cycle
GOBP	159	0.229080625	0.356182995	0.460549632	mitotic cell cycle checkpoint
GOBP	34	0.235679939	0.396551494	0.540759464	mitotic spindle assembly checkpoint
GOBP	21	0.235128184	0.371801856	0.466481991	mitotic G2 DNA damage checkpoint
GOBP	15	0.155005598	0.308039526	0.469454774	regulation of exit from mitosis
GOBP	23	0.257331574	0.362859507	0.479616294	nuclear migration
GOBP	117	0.200631308	0.337265454	0.451949637	centrosome cycle
GOBP	35	0.227307233	0.399785785	0.504397905	centriole replication
GOBP	14	0.191862901	0.298798975	0.432173061	mitotic centrosome separation
GOBP	105	0.273986005	0.379357876	0.481572274	meiosis I
GOBP	43	0.333357721	0.432939565	0.52461144	synapsis
GOBP	20	0.345955875	0.460260312	0.548598378	synaptonemal complex assembly
GOBP	47	0.31687128	0.448081241	0.579055618	reciprocal meiotic recombination
GOBP	10	0.428426087	0.485300625	0.589365541	meiosis II
GOBP	44	0.27752796	0.367911886	0.468862325	male meiotic nuclear division
GOBP	22	0.305128206	0.403697855	0.499640463	male meiosis I
GOBP	29	0.25348912	0.334379862	0.42663373	female meiotic nuclear division
GOBP	1299	0.154277183	0.256555909	0.360075268	cell adhesion
GOBP	124	0.205442789	0.321173885	0.432684777	homophilic cell adhesion via plasma membrane adhesion molecules
GOBP	45	0.21673921	0.322148319	0.424026305	heterophilic cell-cell adhesion via plasma membrane cell adhesion molecules
GOBP	15	0.367219334	0.525345481	0.658568228	neuron cell-cell adhesion
GOBP	319	0.163510953	0.258221968	0.355173324	leukocyte cell-cell adhesion
GOBP	214	0.133598969	0.247383853	0.366320859	cell-matrix adhesion
GOBP	259	0.164004694	0.260384696	0.360894831	negative regulation of cell adhesion
GOBP	203	0.215960153	0.329846387	0.442560938	establishment or maintenance of cell polarity
GOBP	113	0.18926465	0.315764905	0.449379327	establishment of tissue polarity
GOBP	2782	0.154507079	0.251540977	0.34942905	cell surface receptor signaling pathway
GOBP	983	0.176045423	0.275361477	0.3734866	enzyme linked receptor protein signaling pathway
GOBP	10	0.215306007	0.252467757	0.308413005	receptor guanylyl cyclase signaling pathway
GOBP	679	0.17254597	0.274104899	0.375710974	transmembrane receptor protein tyrosine kinase signaling pathway
GOBP	12	0.206994216	0.276286637	0.356279287	activation of transmembrane receptor protein tyrosine kinase activity
GOBP	112	0.209924346	0.323999522	0.439632551	epidermal growth factor receptor signaling pathway
GOBP	12	0.21868513	0.2875616	0.414461596	negative regulation of epidermal growth factor-activated receptor activity
GOBP	26	0.14804653	0.24661742	0.339297209	regulation of epidermal growth factor-activated receptor activity
GOBP	324	0.199417683	0.302858211	0.402715528	transmembrane receptor protein serine/threonine kinase signaling pathway
GOBP	181	0.201774283	0.304323892	0.401698535	transforming growth factor beta receptor signaling pathway
GOBP	12	0.274177647	0.358823162	0.445686692	SMAD protein complex assembly
GOBP	882	0.156339995	0.252690026	0.354684221	G protein-coupled receptor signaling pathway
GOBP	228	0.205188965	0.306669177	0.406036317	G protein-coupled receptor signaling pathway, coupled to cyclic nucleotide second messenger
GOBP	210	0.203236948	0.30464912	0.40231314	adenylate cyclase-modulating G protein-coupled receptor signaling pathway
GOBP	131	0.193164119	0.292685478	0.389984533	adenylate cyclase-activating G protein-coupled receptor signaling pathway
GOBP	38	0.228744976	0.339226543	0.428747521	activation of adenylate cyclase activity
GOBP	11	0.30350894	0.392753864	0.495988996	adenylate cyclase-activating dopamine receptor signaling pathway
GOBP	78	0.240952384	0.348161714	0.44931468	adenylate cyclase-inhibiting G protein-coupled receptor signaling pathway
GOBP	19	0.234185317	0.353956414	0.441812166	negative regulation of adenylate cyclase activity
GOBP	97	0.237770253	0.333750483	0.43233557	phospholipase C-activating G protein-coupled receptor signaling pathway
GOBP	28	0.215985298	0.305681826	0.395148847	activation of phospholipase C activity
GOBP	309	0.157599835	0.249265482	0.348542009	positive regulation of cytosolic calcium ion concentration
GOBP	26	0.149052952	0.247996484	0.364563029	protein kinase C-activating G protein-coupled receptor signaling pathway
GOBP	26	0.456935088	0.573603133	0.663146225	serotonin receptor signaling pathway
GOBP	40	0.221061407	0.330600119	0.442440511	dopamine receptor signaling pathway
GOBP	19	0.274920836	0.376611336	0.482381185	G protein-coupled acetylcholine receptor signaling pathway
GOBP	24	0.199515563	0.585879584	0.715977188	gamma-aminobutyric acid signaling pathway
GOBP	91	0.212618283	0.326383907	0.479611288	glutamate receptor signaling pathway
GOBP	14	0.414173525	0.52476614	0.673046991	G protein-coupled glutamate receptor signaling pathway
GOBP	98	0.188729994	0.313734044	0.436058223	neuropeptide signaling pathway
GOBP	174	0.175331603	0.298586626	0.408351399	Notch signaling pathway
GOBP	10	0.281108947	0.463929388	0.547629946	Notch receptor processing
GOBP	17	0.298366554	0.397690137	0.503946794	positive regulation of transcription of Notch receptor target
GOBP	35	0.232589633	0.328791491	0.448196885	Wnt signaling pathway, calcium modulating pathway
GOBP	132	0.194215809	0.30797248	0.420629535	smoothened signaling pathway
GOBP	103	0.209169542	0.320216077	0.438794956	integrin-mediated signaling pathway
GOBP	262	0.16312488	0.277629954	0.388043972	I-kappaB kinase/NF-kappaB signaling
GOBP	16	0.235006992	0.353957067	0.47013735	activation of NF-kappaB-inducing kinase activity
GOBP	16	0.212126707	0.361096539	0.481668205	I-kappaB phosphorylation
GOBP	197	0.18458793	0.297894979	0.41323303	JNK cascade
GOBP	35	0.229857761	0.363317772	0.470380577	activation of JUN kinase activity
GOBP	140	0.166248036	0.262853462	0.371776505	receptor signaling pathway via JAK-STAT
GOBP	77	0.184340874	0.279351584	0.391530821	tyrosine phosphorylation of STAT protein
GOBP	25	0.093476485	0.196145146	0.304180614	nitric oxide mediated signal transduction
GOBP	510	0.202652141	0.328023255	0.442602302	small GTPase mediated signal transduction
GOBP	362	0.213096002	0.328768902	0.438370719	Ras protein signal transduction
GOBP	126	0.179240257	0.298348285	0.409773053	Rho protein signal transduction
GOBP	1742	0.153658502	0.246852861	0.343467301	cell-cell signaling
GOBP	655	0.176407758	0.282270125	0.38846829	chemical synaptic transmission
GOBP	167	0.21704249	0.316028044	0.421208852	neurotransmitter secretion
GOBP	29	0.271248249	0.418551237	0.587362791	synaptic transmission, cholinergic
GOBP	134	0.15604441	0.245599528	0.339894468	ensheathment of neurons
GOBP	33	0.206949029	0.310588379	0.442003054	neuromuscular synaptic transmission
GOBP	610	0.168096273	0.268573725	0.367724918	gamete generation
GOBP	236	0.184543446	0.284107371	0.384211953	germ cell development
GOBP	465	0.17615291	0.279217452	0.377108602	spermatogenesis
GOBP	138	0.214731194	0.318042271	0.406354971	spermatid development
GOBP	15	0.336119289	0.384039046	0.45118356	sperm axoneme assembly
GOBP	19	0.150766771	0.260423416	0.386625681	spermatid nucleus differentiation
GOBP	128	0.168889391	0.26336504	0.3605291	female gamete generation
GOBP	11	0.194376908	0.225667216	0.290581934	insemination
GOBP	136	0.184964351	0.271940842	0.366841914	single fertilization
GOBP	37	0.226264114	0.321890184	0.428133983	binding of sperm to zona pellucida
GOBP	37	0.15187479	0.249555007	0.381129127	acrosome reaction
GOBP	13	0.299760322	0.366675378	0.585593512	fusion of sperm to egg plasma membrane involved in single fertilization
GOBP	633	0.185562164	0.304787211	0.415679122	regulation of mitotic cell cycle
GOBP	18	0.230499026	0.308040288	0.41488398	blastoderm segmentation
GOBP	15	0.226880644	0.301239725	0.382656833	tripartite regional subdivision
GOBP	114	0.206176244	0.332051717	0.455956804	determination of left/right symmetry
GOBP	174	0.214085255	0.320797854	0.425368952	gastrulation
GOBP	15	0.418258957	0.541000415	0.643644043	segment specification
GOBP	433	0.236597104	0.360693015	0.488027918	pattern specification process
GOBP	20	0.131867487	0.304368086	0.418314735	ectoderm development
GOBP	2221	0.170592079	0.273016248	0.370895859	nervous system development
GOBP	56	0.205745312	0.296326813	0.403134634	neuroblast proliferation
GOBP	441	0.202463239	0.309193555	0.411880383	axonogenesis
GOBP	257	0.223896336	0.334436265	0.439833047	axon guidance
GOBP	23	0.206610186	0.305460569	0.42598073	axonal fasciculation
GOBP	164	0.213547641	0.322577954	0.429447816	synapse assembly
GOBP	954	0.170615016	0.2721753	0.372581527	central nervous system development
GOBP	699	0.176889313	0.280378551	0.380668505	brain development
GOBP	74	0.187789922	0.273076893	0.360679353	peripheral nervous system development
GOBP	546	0.201012303	0.306303912	0.411632947	sensory organ development
GOBP	35	0.221437475	0.32446587	0.438924518	salivary gland development
GOBP	31	0.227705755	0.352199361	0.460936581	salivary gland morphogenesis
GOBP	76	0.223557439	0.327792607	0.432897289	endoderm development
GOBP	11	0.137557788	0.265319035	0.356590346	midgut development
GOBP	119	0.210905831	0.316206988	0.440989919	mesoderm development
GOBP	13	0.335985893	0.500851046	0.575344234	mesodermal cell fate specification
GOBP	524	0.182083551	0.287034114	0.392805047	heart development
GOBP	13	0.245531067	0.36735206	0.450687713	adult heart development
GOBP	359	0.184127334	0.289619951	0.394080345	muscle organ development
GOBP	147	0.181409384	0.295043546	0.401266009	skeletal muscle tissue development
GOBP	43	0.112609993	0.210301886	0.311647345	myoblast fusion
GOBP	49	0.195597103	0.279451698	0.391647042	neuromuscular junction development
GOBP	23	0.293945437	0.407020631	0.511450883	sex determination
GOBP	253	0.186379311	0.280971787	0.37800151	sex differentiation
GOBP	17	0.270714444	0.399170657	0.488322581	dosage compensation
GOBP	175	0.137083456	0.225640283	0.319574337	female pregnancy
GOBP	49	0.150428435	0.242636724	0.338881047	embryo implantation
GOBP	15	0.092188691	0.199198984	0.311538256	parturition
GOBP	285	0.144524567	0.230018217	0.322840963	aging
GOBP	99	0.198801825	0.301447876	0.403956308	cell aging
GOBP	207	0.121267461	0.20039798	0.293368612	response to nutrient
GOBP	66	0.210804499	0.289190406	0.373465804	respiratory gaseous exchange by respiratory system
GOBP	124	0.116543178	0.204846395	0.29855521	digestion
GOBP	59	0.1891835	0.28345695	0.392096711	excretion
GOBP	87	0.120720084	0.205585379	0.29492853	body fluid secretion
GOBP	42	0.131521161	0.215243952	0.315529406	lactation
GOBP	311	0.133807107	0.226219193	0.326229	blood coagulation
GOBP	18	0.150678826	0.255339123	0.379791496	blood coagulation, intrinsic pathway
GOBP	315	0.133810241	0.225969154	0.325961862	hemostasis
GOBP	537	0.149081064	0.251602735	0.355848902	sensory perception
GOBP	199	0.214580454	0.337973065	0.450666401	visual perception
GOBP	54	0.203487353	0.30337964	0.406864013	phototransduction
GOBP	32	0.208700735	0.312384212	0.439333829	phototransduction, visible light
GOBP	139	0.181471236	0.301985291	0.416304061	sensory perception of sound
GOBP	113	0.159089984	0.247818042	0.34675992	sensory perception of chemical stimulus
GOBP	46	0.148753948	0.215932588	0.309642457	sensory perception of smell
GOBP	567	0.163210588	0.25835977	0.355071655	behavior
GOBP	240	0.173253271	0.261048771	0.351280742	learning or memory
GOBP	130	0.166378028	0.259144559	0.359031855	learning
GOBP	111	0.169517522	0.26274727	0.35603722	memory
GOBP	11	0.305952216	0.363330351	0.446819415	short-term memory
GOBP	33	0.17941458	0.272948507	0.376084074	long-term memory
GOBP	20	0.185976936	0.271146918	0.35124175	mating behavior
GOBP	36	0.132655143	0.216766005	0.300350113	mating
GOBP	17	0.11024021	0.209839316	0.281005069	copulation
GOBP	46	0.136071626	0.238427847	0.355059883	rhythmic behavior
GOBP	205	0.139420809	0.244828366	0.358641757	circadian rhythm
GOBP	18	0.187268026	0.260101323	0.37555783	grooming behavior
GOBP	188	0.186306267	0.283990741	0.381774262	locomotory behavior
GOBP	26	0.226745063	0.312879103	0.392572845	adult walking behavior
GOBP	100	0.153033851	0.253215117	0.3647367	feeding behavior
GOBP	46	0.173069659	0.26125944	0.366173026	visual behavior
GOBP	16	0.197147244	0.283302785	0.369341213	chemosensory behavior
GOBP	13	0.264523984	0.330316875	0.403811179	mechanosensory behavior
GOBP	501	0.157978373	0.25192262	0.350647658	blood circulation
GOBP	234	0.197117587	0.305102348	0.413728956	regulation of heart contraction
GOBP	104	0.240490855	0.359572984	0.450110564	tRNA processing
GOBP	159	0.152842689	0.240429162	0.33447009	cell recognition
GOBP	48	0.190004635	0.299327775	0.414980907	neuron recognition
GOBP	29	0.200035296	0.331228249	0.439685069	motor neuron axon guidance
GOBP	27	0.173045468	0.339320697	0.481002805	mitochondrial fusion
GOBP	165	0.174895405	0.309300671	0.424604099	regulation of actin polymerization or depolymerization
GOBP	63	0.218077691	0.340615133	0.453304294	axo-dendritic transport
GOBP	42	0.275826381	0.370341968	0.482948308	anterograde axonal transport
GOBP	17	0.292668235	0.411616408	0.555381303	retrograde axonal transport
GOBP	2596	0.159396289	0.261579594	0.362356083	protein localization
GOBP	189	0.17922718	0.310781965	0.428464524	actin polymerization or depolymerization
GOBP	31	0.145274348	0.260649167	0.376055508	negative regulation of DNA replication
GOBP	302	0.143654232	0.240345905	0.349227756	steroid metabolic process
GOBP	141	0.163468304	0.266545377	0.384428738	cholesterol metabolic process
GOBP	44	0.145082687	0.277892491	0.398855758	bile acid metabolic process
GOBP	40	0.13421895	0.229128186	0.333358211	C21-steroid hormone metabolic process
GOBP	27	0.136040439	0.248778295	0.391322412	androgen metabolic process
GOBP	29	0.157452992	0.240336884	0.4178427	estrogen metabolic process
GOBP	26	0.155539139	0.268317035	0.408284558	glucocorticoid metabolic process
GOBP	13	0.202642754	0.309608679	0.509808702	mineralocorticoid metabolic process
GOBP	148	0.234422901	0.372798067	0.491383479	protein alkylation
GOBP	32	0.436994429	0.597000941	0.710375373	protein dealkylation
GOBP	168	0.152910576	0.240604149	0.336195524	regulation of blood pressure
GOBP	2000	0.146966214	0.245566237	0.346804592	cell death
GOBP	11	0.206661975	0.278958132	0.375519102	opsonization
GOBP	14	0.345257429	0.528534755	0.622651677	sulfate transport
GOBP	136	0.168376302	0.26750484	0.374144081	regulation of G protein-coupled receptor signaling pathway
GOBP	1766	0.16271939	0.2575534	0.355924155	cell population proliferation
GOBP	832	0.161043223	0.253416981	0.349253591	positive regulation of cell population proliferation
GOBP	634	0.170615556	0.265376581	0.365444457	negative regulation of cell population proliferation
GOBP	136	0.173041313	0.289727783	0.400244029	insulin receptor signaling pathway
GOBP	11	0.151486189	0.228278912	0.415562298	intracellular mRNA localization
GOBP	27	0.172565666	0.305988708	0.404709859	isoprenoid biosynthetic process
GOBP	10	0.334512996	0.441818233	0.528195413	isoprenoid catabolic process
GOBP	68	0.164074602	0.256377951	0.358875918	associative learning
GOBP	51	0.255239265	0.390241469	0.515364388	endosome to lysosome transport
GOBP	23	0.165361735	0.416221695	0.559531503	histone mRNA metabolic process
GOBP	17	0.141765961	0.226124792	0.323168278	determination of adult lifespan
GOBP	11	0.126296362	0.247174624	0.374251201	adult feeding behavior
GOBP	70	0.208537738	0.310088043	0.402969187	adult locomotory behavior
GOBP	51	0.169270202	0.263760621	0.353573119	glial cell migration
GOBP	20	0.279046731	0.364904378	0.446673679	asymmetric cell division
GOBP	139	0.122479314	0.257725156	0.396078182	regulation of cell shape
GOBP	167	0.180280552	0.281628449	0.384460049	regulation of cell size
GOBP	134	0.15604441	0.245599528	0.339894468	axon ensheathment
GOBP	403	0.215452954	0.342470076	0.449362878	RNA splicing
GOBP	204	0.177433222	0.273106035	0.369585367	gonad development
GOBP	25	0.2712033	0.460320623	0.542730313	respiratory chain complex IV assembly
GOBP	41	0.171057097	0.261380945	0.363110432	visual learning
GOBP	105	0.213378903	0.314286558	0.445489905	fibroblast growth factor receptor signaling pathway
GOBP	342	0.161521663	0.25819213	0.355695998	epidermis development
GOBP	130	0.182659879	0.288265931	0.389979952	male gonad development
GOBP	97	0.163717933	0.251228687	0.351327593	female gonad development
GOBP	79	0.188325794	0.307357561	0.417673987	regulation of smoothened signaling pathway
GOBP	95	0.209075457	0.322084103	0.421412923	regulation of Notch signaling pathway
GOBP	15	0.226880644	0.301239725	0.382656833	anterior/posterior axis specification, embryo
GOBP	33	0.313265513	0.460079457	0.567958329	attachment of spindle microtubules to kinetochore
GOBP	665	0.158109623	0.260162871	0.360077809	lipid biosynthetic process
GOBP	84	0.149725666	0.250991451	0.364149169	extrinsic apoptotic signaling pathway via death domain receptors
GOBP	96	0.210179875	0.318516839	0.43083226	intrinsic apoptotic signaling pathway in response to DNA damage
GOBP	42	0.185632066	0.312714515	0.41817049	intrinsic apoptotic signaling pathway in response to oxidative stress
GOBP	108	0.169091716	0.268373216	0.375452957	apoptotic mitochondrial changes
GOBP	136	0.156989273	0.263635374	0.360897995	carbohydrate transport
GOBP	103	0.164742222	0.273538179	0.376899359	hexose transmembrane transport
GOBP	70	0.142900706	0.243353907	0.352018406	cellular amino acid biosynthetic process
GOBP	245	0.213857326	0.317309354	0.406135644	phospholipid biosynthetic process
GOBP	11	0.244395133	0.314610809	0.492846972	pyrimidine-containing compound salvage
GOBP	17	0.270714444	0.399170657	0.488322581	dosage compensation by inactivation of X chromosome
GOBP	2435	0.145177821	0.243778779	0.343610235	catabolic process
GOBP	1304	0.165480192	0.272550819	0.382528493	macromolecule catabolic process
GOBP	80	0.170223074	0.334927574	0.465830539	aerobic respiration
GOBP	102	0.189386181	0.318225679	0.435491651	fatty acid catabolic process
GOBP	106	0.11851192	0.22411138	0.349331914	cellular amino acid catabolic process
GOBP	62	0.153511319	0.242575607	0.353895789	glutamine family amino acid metabolic process
GOBP	23	0.167722391	0.258224048	0.390280238	glutamine family amino acid catabolic process
GOBP	42	0.140080594	0.223028282	0.329879206	aspartate family amino acid metabolic process
GOBP	18	0.175234195	0.262539155	0.346854959	aspartate family amino acid biosynthetic process
GOBP	20	0.118221015	0.192280111	0.288953419	aspartate family amino acid catabolic process
GOBP	34	0.086370339	0.186716186	0.318691932	serine family amino acid metabolic process
GOBP	16	0.087483231	0.231948224	0.375199538	serine family amino acid biosynthetic process
GOBP	11	0.090761771	0.231457319	0.342458272	serine family amino acid catabolic process
GOBP	34	0.087148623	0.185152525	0.293589406	aromatic amino acid family metabolic process
GOBP	23	0.084862144	0.161316978	0.289611892	aromatic amino acid family catabolic process
GOBP	21	0.139168541	0.275457833	0.393827326	branched-chain amino acid metabolic process
GOBP	21	0.139168541	0.275457833	0.393827326	branched-chain amino acid catabolic process
GOBP	15	0.143173414	0.221187144	0.376405357	glutamine family amino acid biosynthetic process
GOBP	11	0.218001965	0.307207093	0.409601798	methionine biosynthetic process
GOBP	372	0.174810622	0.280719504	0.380256919	glycoprotein metabolic process
GOBP	306	0.181436235	0.28918714	0.390581795	glycoprotein biosynthetic process
GOBP	135	0.165286465	0.29193654	0.390717544	coenzyme biosynthetic process
GOBP	19	0.175821559	0.270597896	0.385287274	coenzyme catabolic process
GOBP	21	0.109402567	0.199583258	0.314754842	vitamin biosynthetic process
GOBP	17	0.190541626	0.433214538	0.563993696	vitamin catabolic process
GOBP	39	0.138322443	0.238711151	0.368764889	nucleobase metabolic process
GOBP	13	0.210305963	0.376852342	0.473999386	purine nucleobase biosynthetic process
GOBP	97	0.138810212	0.236999005	0.338618733	nucleoside metabolic process
GOBP	475	0.14636674	0.244764903	0.341459201	nucleotide metabolic process
GOBP	68	0.121632099	0.222769838	0.325551083	ribonucleoside metabolic process
GOBP	67	0.173500558	0.274621907	0.385876603	nucleoside monophosphate metabolic process
GOBP	39	0.233344207	0.330686498	0.434138545	nucleoside monophosphate biosynthetic process
GOBP	37	0.145109294	0.271119597	0.4032414	purine nucleoside monophosphate metabolic process
GOBP	19	0.236665046	0.327233783	0.44328702	purine nucleoside monophosphate biosynthetic process
GOBP	14	0.199588772	0.299283962	0.424370878	pyrimidine nucleoside monophosphate metabolic process
GOBP	13	0.26770427	0.334074461	0.442530711	pyrimidine nucleoside monophosphate biosynthetic process
GOBP	140	0.181714766	0.276471035	0.386914366	nucleoside diphosphate metabolic process
GOBP	10	0.316683981	0.400823779	0.493081939	nucleoside diphosphate biosynthetic process
GOBP	122	0.17968256	0.2842678	0.406703126	purine nucleoside diphosphate metabolic process
GOBP	81	0.163515701	0.262557794	0.351196059	nucleoside triphosphate metabolic process
GOBP	56	0.16550625	0.260035927	0.349763498	nucleoside triphosphate biosynthetic process
GOBP	12	0.23273467	0.328400144	0.401259699	nucleoside triphosphate catabolic process
GOBP	60	0.15776935	0.251916304	0.341609424	purine nucleoside triphosphate metabolic process
GOBP	41	0.163460821	0.248446864	0.342876436	purine nucleoside triphosphate biosynthetic process
GOBP	20	0.224331925	0.334674646	0.436226505	pyrimidine nucleoside triphosphate metabolic process
GOBP	17	0.215144179	0.32134327	0.419478384	pyrimidine nucleoside triphosphate biosynthetic process
GOBP	346	0.149619795	0.25026629	0.352209203	purine ribonucleotide metabolic process
GOBP	12	0.193826367	0.273261114	0.361641469	purine deoxyribonucleotide metabolic process
GOBP	139	0.153537522	0.253787326	0.357734181	purine ribonucleotide biosynthetic process
GOBP	31	0.222064032	0.34211002	0.467667585	purine ribonucleotide catabolic process
GOBP	29	0.223709655	0.326444009	0.43843012	ribonucleoside monophosphate biosynthetic process
GOBP	46	0.169390407	0.286166241	0.411827176	ribonucleoside monophosphate metabolic process
GOBP	12	0.177463559	0.247241537	0.417465787	deoxyribonucleoside monophosphate metabolic process
GOBP	35	0.186875273	0.272324056	0.367284807	nucleoside biosynthetic process
GOBP	34	0.12893623	0.233483149	0.328309768	nucleoside catabolic process
GOBP	235	0.155236105	0.254022509	0.349514281	nucleotide biosynthetic process
GOBP	63	0.154334434	0.242321822	0.343364215	nucleotide catabolic process
GOBP	34	0.141217912	0.270347467	0.4131803	purine ribonucleoside monophosphate metabolic process
GOBP	17	0.214626467	0.325237122	0.458451614	purine ribonucleoside monophosphate biosynthetic process
GOBP	122	0.17968256	0.2842678	0.406703126	purine ribonucleoside diphosphate metabolic process
GOBP	125	0.179443632	0.282485852	0.401777724	ribonucleoside diphosphate metabolic process
GOBP	35	0.247190537	0.365844781	0.553190323	cyclic nucleotide metabolic process
GOBP	19	0.239583945	0.30689261	0.475149205	cyclic nucleotide biosynthetic process
GOBP	57	0.171826818	0.268253619	0.362397969	ribonucleoside triphosphate metabolic process
GOBP	17	0.205790814	0.312691728	0.416703029	deoxyribonucleoside triphosphate metabolic process
GOBP	45	0.181113771	0.271736073	0.358355311	ribonucleoside triphosphate biosynthetic process
GOBP	52	0.163563568	0.257053167	0.351426868	purine ribonucleoside triphosphate metabolic process
GOBP	40	0.168650377	0.256400535	0.347172016	purine ribonucleoside triphosphate biosynthetic process
GOBP	14	0.26343035	0.344618829	0.448327954	pyrimidine ribonucleoside triphosphate metabolic process
GOBP	13	0.258845688	0.345435662	0.449539313	pyrimidine ribonucleoside triphosphate biosynthetic process
GOBP	13	0.648231088	0.683698459	0.728035997	cyclic nucleotide catabolic process
GOBP	21	0.205565285	0.284466483	0.379317594	pyrimidine ribonucleotide metabolic process
GOBP	19	0.155125102	0.29938059	0.466862759	pyrimidine deoxyribonucleotide metabolic process
GOBP	19	0.194216527	0.285295476	0.388871701	pyrimidine ribonucleotide biosynthetic process
GOBP	12	0.155194147	0.417304521	0.601238809	pyrimidine deoxyribonucleotide catabolic process
GOBP	35	0.174763845	0.269751096	0.377724963	nucleotide-sugar metabolic process
GOBP	20	0.15175592	0.262176503	0.366740029	nucleotide-sugar biosynthetic process
GOBP	20	0.169162305	0.261629119	0.36292129	cobalamin metabolic process
GOBP	59	0.232591391	0.35707708	0.45326688	glycolipid biosynthetic process
GOBP	42	0.153713735	0.287035003	0.392900478	glucan biosynthetic process
GOBP	23	0.165872926	0.303810532	0.430299234	glucan catabolic process
GOBP	359	0.152063142	0.251472488	0.35143524	ribonucleotide metabolic process
GOBP	150	0.158902533	0.255839059	0.356477224	ribonucleotide biosynthetic process
GOBP	32	0.223054352	0.333573228	0.457510967	ribonucleotide catabolic process
GOBP	35	0.16959948	0.300186551	0.428321519	deoxyribonucleotide metabolic process
GOBP	16	0.167978648	0.284517661	0.450417011	deoxyribonucleotide biosynthetic process
GOBP	19	0.178551875	0.368192202	0.470434502	deoxyribonucleotide catabolic process
GOBP	13	0.163232585	0.24302829	0.401340233	2'-deoxyribonucleotide biosynthetic process
GOBP	223	0.153909645	0.24304777	0.339572215	response to temperature stimulus
GOBP	140	0.167000039	0.273263754	0.376717079	cellular response to starvation
GOBP	36	0.124811021	0.228502704	0.32867073	response to pH
GOBP	18	0.222905245	0.29504992	0.376650556	mRNA transcription
GOBP	70	0.241596873	0.357577827	0.468277804	snRNA transcription
GOBP	28	0.207367328	0.312367235	0.401459866	rRNA transcription
GOBP	549	0.135870929	0.227717009	0.321603979	protein secretion
GOBP	131	0.120888843	0.221653504	0.324536583	amine metabolic process
GOBP	20	0.152731653	0.261660088	0.345671155	amine biosynthetic process
GOBP	22	0.216410199	0.336524132	0.439664951	amine catabolic process
GOBP	47	0.200654795	0.314637744	0.419454487	oligosaccharide metabolic process
GOBP	15	0.288566592	0.367184158	0.457446596	oligosaccharide biosynthetic process
GOBP	12	0.171456926	0.38868331	0.504814323	oligosaccharide catabolic process
GOBP	414	0.144849875	0.236848963	0.338801889	response to radiation
GOBP	31	0.163216401	0.283147371	0.418189433	2'-deoxyribonucleotide metabolic process
GOBP	45	0.222112208	0.319815005	0.4129206	phospholipid catabolic process
GOBP	21	0.12712795	0.256726356	0.427708785	toxin metabolic process
GOBP	158	0.161015962	0.257155152	0.36344248	response to heat
GOBP	47	0.13878534	0.229176254	0.331920395	response to cold
GOBP	264	0.148809843	0.239440103	0.342354918	response to xenobiotic stimulus
GOBP	133	0.165895913	0.274493001	0.388421108	response to UV
GOBP	15	0.129975132	0.179197799	0.234589533	response to water
GOBP	290	0.140441428	0.22983067	0.32886238	response to light stimulus
GOBP	29	0.12565938	0.272780228	0.37886735	NAD biosynthetic process
GOBP	13	0.297126344	0.374034747	0.459803824	carnitine metabolic process
GOBP	131	0.209687869	0.340339492	0.439710467	RNA modification
GOBP	32	0.200528259	0.400950897	0.535772973	7-methylguanosine RNA capping
GOBP	165	0.194826471	0.282477826	0.373166938	fertilization
GOBP	133	0.154112878	0.261720101	0.364566795	detection of external stimulus
GOBP	136	0.148601332	0.254857929	0.358660645	detection of abiotic stimulus
GOBP	70	0.197759937	0.308383286	0.429287109	detection of light stimulus
GOBP	59	0.178936833	0.298990847	0.428817614	detection of visible light
GOBP	95	0.143764052	0.235975734	0.334919192	detection of chemical stimulus
GOBP	28	0.150953099	0.251678535	0.375555957	detection of biotic stimulus
GOBP	2536	0.132634424	0.222551781	0.315233037	response to external stimulus
GOBP	1318	0.137318085	0.228458769	0.324725826	response to biotic stimulus
GOBP	635	0.142844916	0.23519845	0.333573448	response to wounding
GOBP	198	0.129526829	0.214821059	0.304205855	response to mechanical stimulus
GOBP	309	0.179795122	0.281717062	0.384334551	response to virus
GOBP	573	0.121369398	0.207797619	0.303329286	response to bacterium
GOBP	44	0.146656797	0.242217991	0.344252919	response to fungus
GOBP	1147	0.137052658	0.226208124	0.319725427	response to abiotic stimulus
GOBP	11	0.206452025	0.26246774	0.327115869	response to gravity
GOBP	12	0.12201928	0.192055063	0.302926915	response to herbicide
GOBP	490	0.130534673	0.219083117	0.31336974	response to toxic substance
GOBP	11	0.150041949	0.241919544	0.352554545	response to light intensity
GOBP	27	0.162348913	0.259946194	0.353960301	photoperiodism
GOBP	28	0.194063288	0.270128382	0.357823504	entrainment of circadian clock
GOBP	13	0.17161624	0.23738236	0.408147741	UV protection
GOBP	25	0.143465471	0.228675073	0.322912555	response to salt stress
GOBP	2527	0.167787518	0.271463962	0.373121375	anatomical structure morphogenesis
GOBP	50	0.139505936	0.221285639	0.325897939	catechol-containing compound metabolic process
GOBP	17	0.160233121	0.23745254	0.344263846	catechol-containing compound biosynthetic process
GOBP	1593	0.153605147	0.246380448	0.341176174	response to endogenous stimulus
GOBP	947	0.145986383	0.23796989	0.334092512	response to hormone
GOBP	214	0.171331056	0.259690726	0.348337207	response to carbohydrate
GOBP	184	0.180424983	0.268620787	0.357360203	response to hexose
GOBP	180	0.180044162	0.269150102	0.357785624	response to glucose
GOBP	214	0.169074586	0.2805851	0.385824123	hormone-mediated signaling pathway
GOBP	1000	0.191595761	0.299834851	0.405394328	embryo development
GOBP	84	0.149097014	0.240967318	0.345912027	post-embryonic development
GOBP	633	0.198643739	0.303171471	0.409011119	embryo development ending in birth or egg hatching
GOBP	82	0.270246067	0.382825665	0.504334615	axis specification
GOBP	124	0.192109312	0.322682086	0.450161833	specification of symmetry
GOBP	13	0.507344184	0.700603947	0.794353321	flavonoid metabolic process
GOBP	123	0.191738027	0.322605607	0.448866154	determination of bilateral symmetry
GOBP	65	0.303626387	0.407904629	0.514689719	embryonic pattern specification
GOBP	13	0.114012403	0.223869566	0.355825916	post-embryonic animal morphogenesis
GOBP	1024	0.18145269	0.289412229	0.399184439	animal organ morphogenesis
GOBP	1853	0.167723755	0.267294587	0.367018076	tissue development
GOBP	1443	0.19450884	0.304650635	0.414394731	negative regulation of biosynthetic process
GOBP	1896	0.177429949	0.282811423	0.39069328	positive regulation of biosynthetic process
GOBP	2747	0.162659306	0.266406304	0.370371704	negative regulation of metabolic process
GOBP	943	0.174777288	0.275907251	0.376639341	regulation of catabolic process
GOBP	290	0.178821407	0.278391067	0.380046352	negative regulation of catabolic process
GOBP	423	0.182292337	0.284148339	0.385542531	positive regulation of catabolic process
GOBP	241	0.166696227	0.256129353	0.350154526	epidermal cell differentiation
GOBP	302	0.150422885	0.240141437	0.330385457	hormone transport
GOBP	48	0.235307122	0.344312728	0.486679724	anterior/posterior axis specification
GOBP	10	0.289682609	0.371247934	0.461933953	dorsal/ventral axis specification
GOBP	208	0.267149086	0.398947452	0.536702276	anterior/posterior pattern specification
GOBP	86	0.232827258	0.368597515	0.487989086	dorsal/ventral pattern formation
GOBP	32	0.337914896	0.501475651	0.633683426	proximal/distal pattern formation
GOBP	2862	0.159925229	0.262321914	0.361217358	regulation of signal transduction
GOBP	1518	0.153673426	0.251668244	0.350336163	positive regulation of signal transduction
GOBP	1174	0.163912428	0.268692264	0.368887324	negative regulation of signal transduction
GOBP	12	0.118224451	0.470709745	0.636038384	cytidine deamination
GOBP	68	0.165419485	0.26550682	0.372537446	cell-cell recognition
GOBP	497	0.126290274	0.214662027	0.309392039	response to extracellular stimulus
GOBP	48	0.178119278	0.291386008	0.396070328	oocyte differentiation
GOBP	210	0.174576881	0.261645954	0.35367485	glial cell differentiation
GOBP	18	0.286160829	0.405111134	0.494831681	cardioblast differentiation
GOBP	517	0.134934622	0.222601189	0.312981053	response to inorganic substance
GOBP	340	0.1434938	0.229385519	0.31816954	response to metal ion
GOBP	32	0.17448608	0.242229699	0.33488844	response to iron ion
GOBP	17	0.175753826	0.263652389	0.349830223	response to manganese ion
GOBP	49	0.115080921	0.202177169	0.304990518	response to zinc ion
GOBP	35	0.359580048	0.467343964	0.562046659	specification of animal organ identity
GOBP	18	0.145853435	0.231006348	0.324487169	regulation of proton transport
GOBP	30	0.215964884	0.317014715	0.473527668	response to X-ray
GOBP	48	0.175749449	0.282233267	0.390322178	body morphogenesis
GOBP	11	0.134578045	0.218226458	0.379013761	embryonic body morphogenesis
GOBP	136	0.188850929	0.304226936	0.418507658	response to ionizing radiation
GOBP	17	0.141488741	0.226246968	0.323769361	response to UV-B
GOBP	15	0.082307883	0.232380318	0.391410359	response to UV-C
GOBP	22	0.158636334	0.257854083	0.351432405	response to lithium ion
GOBP	976	0.146616103	0.233248339	0.325075928	response to organonitrogen compound
GOBP	14	0.143138587	0.377797577	0.530884751	establishment or maintenance of transmembrane electrochemical gradient
GOBP	400	0.199358151	0.310889522	0.418414126	endomembrane system organization
GOBP	60	0.215741533	0.350263065	0.486842323	NADH dehydrogenase complex assembly
GOBP	34	0.123438181	0.209643966	0.301398526	multicellular organism aging
GOBP	13	0.297382661	0.383226124	0.737677008	detoxification of copper ion
GOBP	21	0.119935009	0.237264729	0.31325442	response to lead ion
GOBP	17	0.072702265	0.159716936	0.289137756	regulation of hydrogen peroxide metabolic process
GOBP	83	0.150693531	0.252243646	0.381450355	membrane invagination
GOBP	50	0.206527766	0.31400894	0.425637928	response to gamma radiation
GOBP	183	0.201519635	0.321271413	0.425563714	regulation of G2/M transition of mitotic cell cycle
GOBP	29	0.313199634	0.468270698	0.568140818	histone monoubiquitination
GOBP	10	0.286420759	0.352952197	0.455932429	hydrogen peroxide-mediated programmed cell death
GOBP	21	0.134719661	0.259814487	0.350699691	response to acidic pH
GOBP	15	0.37280779	0.491851349	0.547497066	histone H3-K36 methylation
GOBP	28	0.30011819	0.410238087	0.516677293	regulation of cell fate commitment
GOBP	12	0.317485711	0.436704591	0.518923472	negative regulation of cell fate commitment
GOBP	13	0.238266287	0.387549337	0.510062975	centriole-centriole cohesion
GOBP	26	0.213107411	0.389406132	0.504638425	exit from mitosis
GOBP	22	0.188409444	0.282060147	0.404970898	positive regulation of heart rate
GOBP	40	0.281740719	0.385780362	0.510739813	mesenchymal cell proliferation
GOBP	30	0.2673977	0.377376655	0.520362647	regulation of mesenchymal cell proliferation
GOBP	222	0.131317195	0.22554104	0.328167423	negative regulation of peptidase activity
GOBP	144	0.154105825	0.24617905	0.34072143	regulation of signaling receptor activity
GOBP	35	0.20664553	0.306025494	0.414752063	regulation of gastrulation
GOBP	445	0.202769659	0.324593292	0.435464113	proteasomal protein catabolic process
GOBP	20	0.180540624	0.297084626	0.482599313	proteasomal ubiquitin-independent protein catabolic process
GOBP	316	0.194470698	0.29416523	0.392546245	regulation of autophagy
GOBP	78	0.184216199	0.280823788	0.385177718	negative regulation of autophagy
GOBP	119	0.205757384	0.308007818	0.402802866	positive regulation of autophagy
GOBP	63	0.192841859	0.281715731	0.368714611	regulation of phospholipase activity
GOBP	52	0.194140012	0.283459924	0.378454616	positive regulation of phospholipase activity
GOBP	92	0.140772212	0.229518871	0.32695421	regulation of calcium ion transport into cytosol
GOBP	16	0.189658058	0.265363027	0.340222884	negative regulation of calcium ion transport into cytosol
GOBP	52	0.146647803	0.23197692	0.327422477	positive regulation of calcium ion transport into cytosol
GOBP	22	0.305154528	0.383138429	0.501481394	regulation of transposition
GOBP	22	0.305154528	0.383138429	0.501481394	negative regulation of transposition
GOBP	33	0.139201444	0.241586861	0.333091631	regulation of platelet activation
GOBP	19	0.158565556	0.253331776	0.333230871	negative regulation of platelet activation
GOBP	1777	0.186206535	0.294154616	0.401368826	positive regulation of macromolecule biosynthetic process
GOBP	1366	0.202062282	0.314972143	0.424344516	negative regulation of macromolecule biosynthetic process
GOBP	39	0.146886435	0.228570546	0.314624449	regulation of glycoprotein biosynthetic process
GOBP	19	0.146980598	0.250503214	0.336780191	positive regulation of glycoprotein biosynthetic process
GOBP	14	0.158472384	0.23541123	0.348244769	negative regulation of glycoprotein biosynthetic process
GOBP	1082	0.151271079	0.246270915	0.3476325	positive regulation of phosphorus metabolic process
GOBP	514	0.170072956	0.27593807	0.378068604	negative regulation of phosphorus metabolic process
GOBP	694	0.180009903	0.300610709	0.415401074	regulation of cell cycle process
GOBP	170	0.143331538	0.240421484	0.343269453	regulation of cellular ketone metabolic process
GOBP	16	0.114851089	0.233630632	0.328450376	regulation of ketone biosynthetic process
GOBP	39	0.165787108	0.27839106	0.394644099	regulation of double-strand break repair via homologous recombination
GOBP	32	0.164357949	0.255568768	0.358347765	vascular endothelial growth factor production
GOBP	30	0.164297939	0.258826962	0.357977312	regulation of vascular endothelial growth factor production
GOBP	27	0.173087001	0.25884834	0.357738569	positive regulation of vascular endothelial growth factor production
GOBP	25	0.283903503	0.419877593	0.557105861	miRNA metabolic process
GOBP	30	0.190650577	0.284609706	0.378073529	regulation of lamellipodium assembly
GOBP	22	0.237153342	0.313971624	0.405491496	positive regulation of lamellipodium assembly
GOBP	154	0.213338243	0.308835318	0.409137311	regulation of endothelial cell migration
GOBP	95	0.229294211	0.317635118	0.413591291	positive regulation of endothelial cell migration
GOBP	48	0.206618982	0.310358967	0.417069575	negative regulation of endothelial cell migration
GOBP	2516	0.164670398	0.271094673	0.376909846	negative regulation of macromolecule metabolic process
GOBP	542	0.182469577	0.294063049	0.401854939	posttranscriptional regulation of gene expression
GOBP	49	0.186662853	0.284052386	0.391839487	regulation of cardiac muscle hypertrophy
GOBP	24	0.200783549	0.300084516	0.416669708	positive regulation of cardiac muscle hypertrophy
GOBP	25	0.15342383	0.263816107	0.358558972	negative regulation of cardiac muscle hypertrophy
GOBP	13	0.101571304	0.226199486	0.319426854	programmed cell death involved in cell development
GOBP	1881	0.17791712	0.285833052	0.39326799	positive regulation of gene expression
GOBP	1737	0.18017076	0.291971936	0.40147019	negative regulation of gene expression
GOBP	272	0.203886027	0.303361749	0.401256065	epithelial cell migration
GOBP	212	0.214335462	0.308205151	0.404691439	regulation of epithelial cell migration
GOBP	63	0.218174021	0.324830834	0.425466753	negative regulation of epithelial cell migration
GOBP	137	0.219255523	0.306934908	0.401013172	positive regulation of epithelial cell migration
GOBP	12	0.159122261	0.252873967	0.444316435	regulation of mitochondrial fusion
GOBP	575	0.159117466	0.268918348	0.379281868	positive regulation of organelle organization
GOBP	360	0.179789991	0.289420416	0.394755769	negative regulation of organelle organization
GOBP	22	0.153845689	0.273594303	0.373023194	regulation of platelet-derived growth factor receptor signaling pathway
GOBP	13	0.182814418	0.274629963	0.373201238	negative regulation of platelet-derived growth factor receptor signaling pathway
GOBP	32	0.312085724	0.418996564	0.513309417	cell communication by electrical coupling
GOBP	1736	0.150494274	0.246854556	0.343960168	positive regulation of cell communication
GOBP	1310	0.154712032	0.258342399	0.358779842	negative regulation of cell communication
GOBP	14	0.218417461	0.368737517	0.536038237	regulation of cell communication by electrical coupling
GOBP	34	0.200705109	0.290005706	0.387440795	negative regulation of muscle cell apoptotic process
GOBP	67	0.19888775	0.294398656	0.402053272	muscle cell apoptotic process
GOBP	40	0.201256044	0.292044048	0.405628727	striated muscle cell apoptotic process
GOBP	38	0.198212158	0.291091474	0.402569458	cardiac muscle cell apoptotic process
GOBP	63	0.202122907	0.303849367	0.407281767	regulation of muscle cell apoptotic process
GOBP	26	0.230955011	0.324786386	0.45069718	positive regulation of muscle cell apoptotic process
GOBP	37	0.206442761	0.298135029	0.409564551	regulation of striated muscle cell apoptotic process
GOBP	12	0.21773648	0.258685798	0.368812686	positive regulation of striated muscle cell apoptotic process
GOBP	24	0.230680285	0.3324147	0.422034136	negative regulation of striated muscle cell apoptotic process
GOBP	35	0.202113595	0.293967425	0.406470306	regulation of cardiac muscle cell apoptotic process
GOBP	12	0.21773648	0.258685798	0.368812686	positive regulation of cardiac muscle cell apoptotic process
GOBP	21	0.23289099	0.336250608	0.424014388	negative regulation of cardiac muscle cell apoptotic process
GOBP	20	0.112403928	0.248536784	0.356524726	epithelial structure maintenance
GOBP	133	0.144183671	0.257354533	0.364480076	regulation of cellular carbohydrate metabolic process
GOBP	53	0.151742182	0.250594864	0.355872248	positive regulation of cellular carbohydrate metabolic process
GOBP	41	0.191911625	0.313185047	0.405307675	negative regulation of cellular carbohydrate metabolic process
GOBP	37	0.08801649	0.194746757	0.313888615	regulation of collagen metabolic process
GOBP	10	0.163194838	0.248937999	0.334556506	negative regulation of collagen metabolic process
GOBP	24	0.060730295	0.173006483	0.299824536	positive regulation of collagen metabolic process
GOBP	14	0.212611977	0.283969765	0.380692871	regulation of extracellular matrix disassembly
GOBP	89	0.21513552	0.328946151	0.43862223	regulation of epithelial to mesenchymal transition
GOBP	46	0.2390412	0.358505546	0.465492034	positive regulation of epithelial to mesenchymal transition
GOBP	34	0.243158192	0.347944055	0.460645916	negative regulation of epithelial to mesenchymal transition
GOBP	513	0.156643509	0.259533359	0.361446256	positive regulation of cell development
GOBP	312	0.183062002	0.282256551	0.386125331	negative regulation of cell development
GOBP	36	0.124888271	0.249104727	0.360515373	protein kinase A signaling
GOBP	24	0.160746431	0.297344609	0.385527266	regulation of protein kinase A signaling
GOBP	10	0.067864096	0.179741452	0.325210508	positive regulation of protein kinase A signaling
GOBP	33	0.192868279	0.274475637	0.371502861	macrophage derived foam cell differentiation
GOBP	28	0.204688441	0.280298381	0.374845697	regulation of macrophage derived foam cell differentiation
GOBP	16	0.173297051	0.252165018	0.339796637	positive regulation of macrophage derived foam cell differentiation
GOBP	12	0.220608856	0.310273135	0.472977964	negative regulation of macrophage derived foam cell differentiation
GOBP	13	0.151769545	0.215741522	0.295358583	regulation of cGMP-mediated signaling
GOBP	11	0.081403561	0.164588977	0.231728885	regulation of plasminogen activation
GOBP	26	0.142577038	0.270531828	0.367721366	regulation of macrophage chemotaxis
GOBP	18	0.258113547	0.332592169	0.400379887	positive regulation of macrophage chemotaxis
GOBP	37	0.159511721	0.272893787	0.411169823	fibroblast migration
GOBP	26	0.159008813	0.271415728	0.413506436	regulation of fibroblast migration
GOBP	11	0.178601394	0.343299555	0.452437928	positive regulation of fibroblast migration
GOBP	32	0.190061898	0.330013481	0.454319413	positive regulation of sodium ion transport
GOBP	17	0.269351207	0.39775101	0.50547764	negative regulation of sodium ion transport
GOBP	288	0.184038947	0.300702446	0.410418766	regulation of cell morphogenesis involved in differentiation
GOBP	149	0.160985582	0.286658323	0.401371781	positive regulation of cell morphogenesis involved in differentiation
GOBP	91	0.229522482	0.341151408	0.451960662	negative regulation of cell morphogenesis involved in differentiation
GOBP	42	0.207344788	0.311331809	0.408544113	regulation of peptidyl-threonine phosphorylation
GOBP	27	0.193271286	0.286618645	0.373237314	positive regulation of peptidyl-threonine phosphorylation
GOBP	18	0.24985852	0.35511261	0.427811406	negative regulation of peptidyl-threonine phosphorylation
GOBP	57	0.178808845	0.297245207	0.421238418	regulation of tumor necrosis factor-mediated signaling pathway
GOBP	19	0.1316395	0.226346264	0.34170565	negative regulation of tumor necrosis factor-mediated signaling pathway
GOBP	200	0.151224692	0.266773454	0.383771596	regulation of cell-substrate adhesion
GOBP	115	0.145926107	0.264854607	0.381920628	positive regulation of cell-substrate adhesion
GOBP	59	0.153316863	0.278240124	0.404736555	negative regulation of cell-substrate adhesion
GOBP	507	0.1401334	0.226931555	0.316004848	regulation of hormone levels
GOBP	26	0.155625326	0.253867528	0.406209221	T cell chemotaxis
GOBP	17	0.133581946	0.232971341	0.369468665	regulation of T cell chemotaxis
GOBP	16	0.133581946	0.235060364	0.369468665	positive regulation of T cell chemotaxis
GOBP	174	0.170300405	0.267892307	0.373023433	regulation of mitochondrion organization
GOBP	109	0.164767374	0.268702652	0.375868227	positive regulation of mitochondrion organization
GOBP	55	0.164941052	0.264773285	0.390095408	negative regulation of mitochondrion organization
GOBP	42	0.2484504	0.385333243	0.493621331	regulation of centrosome duplication
GOBP	13	0.357691259	0.438412261	0.504683824	negative regulation of centrosome duplication
GOBP	69	0.162795928	0.269466514	0.376790984	regulation of glucose transmembrane transport
GOBP	40	0.151429592	0.27140162	0.384489357	positive regulation of glucose transmembrane transport
GOBP	17	0.20078398	0.291000489	0.383691361	negative regulation of glucose transmembrane transport
GOBP	55	0.134740483	0.247396141	0.356650784	regulation of myotube differentiation
GOBP	31	0.115282173	0.230417794	0.330434485	positive regulation of myotube differentiation
GOBP	18	0.173769144	0.299857958	0.401461054	negative regulation of myotube differentiation
GOBP	75	0.244184645	0.370039004	0.484137558	telomere maintenance via telomere lengthening
GOBP	31	0.222949854	0.315917173	0.402367111	regulation of keratinocyte proliferation
GOBP	12	0.208814786	0.283293364	0.376546386	positive regulation of keratinocyte proliferation
GOBP	12	0.279295142	0.359854703	0.466502226	negative regulation of keratinocyte proliferation
GOBP	23	0.299450179	0.376157925	0.456291358	retina layer formation
GOBP	47	0.238018742	0.421308666	0.544239389	positive regulation of pathway-restricted SMAD protein phosphorylation
GOBP	39	0.194130003	0.29852337	0.39127798	positive regulation of phospholipase C activity
GOBP	18	0.114500107	0.242046905	0.396575051	regulation of triglyceride biosynthetic process
GOBP	13	0.184417714	0.29470057	0.483064179	positive regulation of triglyceride biosynthetic process
GOBP	23	0.197349735	0.258947177	0.347064801	regulation of receptor biosynthetic process
GOBP	13	0.201451527	0.263981292	0.357088859	positive regulation of receptor biosynthetic process
GOBP	11	0.349495796	0.430790111	0.617531195	regulation of cholesterol esterification
GOBP	26	0.195519966	0.293515189	0.409924197	regulation of cholesterol efflux
GOBP	19	0.183146829	0.274823851	0.397373858	positive regulation of cholesterol efflux
GOBP	372	0.161020016	0.258941761	0.358057181	lipid localization
GOBP	18	0.273631533	0.383412918	0.520358354	cholesterol storage
GOBP	27	0.23695489	0.35045206	0.467217553	regulation of release of sequestered calcium ion into cytosol by sarcoplasmic reticulum
GOBP	19	0.267828477	0.389191954	0.494957803	regulation of cardiac muscle contraction by regulation of the release of sequestered calcium ion
GOBP	24	0.289431648	0.403067192	0.506956173	regulation of cardiac muscle contraction by calcium ion signaling
GOBP	49	0.206859825	0.298481606	0.402795125	regulation of lipid storage
GOBP	25	0.199473586	0.311120642	0.424762486	positive regulation of lipid storage
GOBP	16	0.263016551	0.380396599	0.51561309	regulation of cholesterol storage
GOBP	20	0.227843664	0.31362257	0.426919817	negative regulation of lipid storage
GOBP	14	0.373336975	0.510852336	0.587993056	regulation of sequestering of triglyceride
GOBP	18	0.18288391	0.279744324	0.360770562	positive regulation of steroid biosynthetic process
GOBP	22	0.173685797	0.260703619	0.357370878	negative regulation of steroid biosynthetic process
GOBP	14	0.31678609	0.415695965	0.508664644	regulation of triglyceride catabolic process
GOBP	108	0.143703226	0.266619286	0.376986623	regulation of glucose metabolic process
GOBP	34	0.149158921	0.264794488	0.367132482	positive regulation of glucose metabolic process
GOBP	12	0.158208519	0.237471116	0.386865598	negative regulation of mitochondrial membrane potential
GOBP	10	0.149967589	0.210772706	0.323548578	positive regulation of mitochondrial membrane potential
GOBP	14	0.143301706	0.250510854	0.386168468	regulation of inositol phosphate biosynthetic process
GOBP	155	0.166932254	0.286172456	0.386676132	regulation of phosphatase activity
GOBP	33	0.149857696	0.245377256	0.366153151	positive regulation of phosphatase activity
GOBP	89	0.162823446	0.278268286	0.369605686	negative regulation of phosphatase activity
GOBP	110	0.169443264	0.28142714	0.409584814	cellular component assembly involved in morphogenesis
GOBP	12	0.259749477	0.41027129	0.457362513	macrophage cytokine production
GOBP	10	0.319390724	0.430551382	0.470673235	regulation of macrophage cytokine production
GOBP	28	0.089894849	0.237346238	0.393697649	regulation of necrotic cell death
GOBP	1525	0.150701576	0.250242566	0.352426612	regulation of cell death
GOBP	657	0.159524065	0.258427793	0.363511605	positive regulation of cell death
GOBP	10	0.158410853	0.293662275	0.519599877	negative regulation of transcription by competitive promoter binding
GOBP	308	0.21257575	0.334625294	0.44288624	negative regulation of cell cycle process
GOBP	161	0.147738099	0.242313655	0.344701986	positive regulation of endopeptidase activity
GOBP	215	0.128297994	0.221392877	0.324866809	negative regulation of endopeptidase activity
GOBP	178	0.149507768	0.245296743	0.345346631	positive regulation of peptidase activity
GOBP	23	0.094706397	0.185126382	0.299320129	positive regulation of protein processing
GOBP	30	0.083201722	0.180160373	0.333919037	negative regulation of protein processing
GOBP	349	0.150149152	0.251724873	0.359607897	regulation of metal ion transport
GOBP	11	0.141651903	0.257130047	0.378645204	magnesium ion homeostasis
GOBP	26	0.089826491	0.273664901	0.407606771	regulation of glucan biosynthetic process
GOBP	58	0.292063959	0.438004135	0.574524835	regulation of mitotic sister chromatid separation
GOBP	143	0.225973113	0.351256266	0.466151424	transport along microtubule
GOBP	26	0.344406908	0.415528029	0.497295393	positive regulation of G2/M transition of mitotic cell cycle
GOBP	87	0.196664357	0.32634815	0.448042333	negative regulation of G2/M transition of mitotic cell cycle
GOBP	474	0.185022353	0.291051276	0.395233531	regulation of neuron projection development
GOBP	262	0.169772311	0.279060168	0.387900008	positive regulation of neuron projection development
GOBP	143	0.21899402	0.32036027	0.423057749	negative regulation of neuron projection development
GOBP	17	0.19548452	0.292766225	0.379627815	regulation of lipoprotein particle clearance
GOBP	11	0.245435928	0.297525115	0.391490378	regulation of low-density lipoprotein particle clearance
GOBP	10	0.241042813	0.305553913	0.388120547	ubiquitin recycling
GOBP	24	0.144114526	0.25404529	0.362628356	response to auditory stimulus
GOBP	10	0.266217659	0.358128764	0.464414704	regulation of translational initiation by eIF2 alpha phosphorylation
GOBP	1881	0.148750065	0.247786121	0.349380554	programmed cell death
GOBP	35	0.170745621	0.248262901	0.336940571	astrocyte development
GOBP	43	0.192193992	0.273245762	0.363074412	oligodendrocyte development
GOBP	43	0.194138632	0.273637343	0.356667984	glial cell proliferation
GOBP	112	0.177847544	0.267040047	0.365204789	regulation of gliogenesis
GOBP	40	0.205912945	0.299166086	0.401827589	negative regulation of gliogenesis
GOBP	67	0.16095462	0.242583912	0.343675725	positive regulation of gliogenesis
GOBP	94	0.185229724	0.311163059	0.431470122	primary neural tube formation
GOBP	12	0.199266441	0.303855657	0.392833044	neural crest formation
GOBP	78	0.256572387	0.348073842	0.451389604	mesenchymal cell development
GOBP	74	0.254929077	0.346018043	0.445825943	neural crest cell development
GOBP	83	0.260329948	0.349150528	0.448995381	neural crest cell differentiation
GOBP	37	0.203949374	0.285997441	0.368198405	Schwann cell differentiation
GOBP	29	0.196343015	0.27260505	0.363675168	Schwann cell development
GOBP	33	0.214156604	0.294745327	0.428280428	dopamine secretion
GOBP	43	0.179539124	0.278916809	0.398316099	glutamate secretion
GOBP	13	0.261776069	0.323341878	0.467115259	regulation of glutamate secretion
GOBP	10	0.205017424	0.244607141	0.30729218	gamma-aminobutyric acid secretion
GOBP	33	0.214156604	0.294745327	0.428280428	regulation of dopamine secretion
GOBP	15	0.285091116	0.385538071	0.487946982	regulation of norepinephrine secretion
GOBP	139	0.164848024	0.262381161	0.365893153	phosphatidylinositol 3-kinase signaling
GOBP	115	0.167719744	0.269257299	0.375705719	regulation of phosphatidylinositol 3-kinase signaling
GOBP	14	0.160962412	0.266839486	0.390470574	negative regulation of phosphatidylinositol 3-kinase signaling
GOBP	80	0.166554372	0.264184533	0.371775628	positive regulation of phosphatidylinositol 3-kinase signaling
GOBP	899	0.141040483	0.228670848	0.322969603	response to organic cyclic compound
GOBP	30	0.140422237	0.241638726	0.337689729	response to isoquinoline alkaloid
GOBP	143	0.157194782	0.236738153	0.326011629	response to purine-containing compound
GOBP	42	0.164854807	0.250744906	0.354311135	response to amine
GOBP	345	0.192944407	0.297594746	0.403107793	striated muscle tissue development
GOBP	13	0.166734531	0.289294325	0.379538608	regulation of skeletal muscle adaptation
GOBP	27	0.163375551	0.27236756	0.362665397	negative regulation of muscle hypertrophy
GOBP	25	0.201574488	0.295195609	0.404757062	positive regulation of muscle hypertrophy
GOBP	52	0.191551612	0.284481853	0.386420201	regulation of muscle hypertrophy
GOBP	10	0.203188492	0.298475077	0.397448753	negative regulation of muscle adaptation
GOBP	31	0.144413057	0.295861883	0.4444774	release of sequestered calcium ion into cytosol by sarcoplasmic reticulum
GOBP	73	0.208585108	0.30687319	0.403545736	muscle cell migration
GOBP	12	0.243751272	0.381787897	0.513326695	regulation of skeletal muscle contraction
GOBP	10	0.161907602	0.30347733	0.419513518	tonic smooth muscle contraction
GOBP	21	0.155040569	0.271344473	0.381076602	phasic smooth muscle contraction
GOBP	66	0.132351403	0.230020327	0.326704461	response to activity
GOBP	21	0.193733808	0.292534337	0.412165387	vascular smooth muscle contraction
GOBP	12	0.133614286	0.260480701	0.36772401	gastro-intestinal system smooth muscle contraction
GOBP	13	0.179036216	0.318498885	0.419472358	skeletal muscle satellite cell proliferation
GOBP	12	0.173577892	0.313915428	0.412403995	regulation of skeletal muscle satellite cell proliferation
GOBP	21	0.180827158	0.280896909	0.352279864	response to muscle activity
GOBP	14	0.066496233	0.161544942	0.282631248	response to inactivity
GOBP	61	0.263375878	0.367588553	0.470322426	striated muscle cell proliferation
GOBP	13	0.179036216	0.318498885	0.419472358	skeletal muscle cell proliferation
GOBP	12	0.173577892	0.313915428	0.412403995	regulation of skeletal muscle cell proliferation
GOBP	11	0.045159773	0.221910939	0.491713473	skeletal myofibril assembly
GOBP	11	0.115398386	0.192039349	0.330439992	response to muscle inactivity
GOBP	13	0.108941447	0.193375033	0.325421168	response to stimulus involved in regulation of muscle adaptation
GOBP	10	0.109727875	0.168064562	0.314063193	response to muscle inactivity involved in regulation of muscle adaptation
GOBP	22	0.304335584	0.393231147	0.488626555	cardiac muscle adaptation
GOBP	44	0.206932646	0.337828595	0.437286695	striated muscle adaptation
GOBP	11	0.141384201	0.278544558	0.391831279	muscle atrophy
GOBP	10	0.109727875	0.168064562	0.314063193	response to denervation involved in regulation of muscle adaptation
GOBP	80	0.193924494	0.298113112	0.406199445	muscle hypertrophy
GOBP	78	0.193529971	0.299979529	0.408739111	striated muscle hypertrophy
GOBP	22	0.304335584	0.393231147	0.488626555	cardiac muscle hypertrophy in response to stress
GOBP	104	0.13170062	0.236820451	0.351856441	myotube differentiation
GOBP	31	0.142977871	0.264165169	0.38732567	myotube cell development
GOBP	61	0.19560101	0.293800613	0.388876693	smooth muscle cell migration
GOBP	56	0.194032315	0.293455529	0.390310264	regulation of smooth muscle cell migration
GOBP	34	0.201625967	0.308067631	0.397290644	positive regulation of smooth muscle cell migration
GOBP	21	0.18856913	0.280534568	0.391783972	negative regulation of smooth muscle cell migration
GOBP	25	0.260231373	0.39073187	0.521457424	heparan sulfate proteoglycan biosynthetic process
GOBP	1888	0.156756591	0.258002794	0.361209144	protein transport
GOBP	14	0.089001438	0.156641958	0.267821572	gas transport
GOBP	10	0.099464202	0.153182857	0.336687679	oxygen transport
GOBP	476	0.193804128	0.300769615	0.404380574	monovalent inorganic cation transport
GOBP	14	0.320661786	0.387917469	0.522711527	magnesium ion transport
GOBP	28	0.135836568	0.249189433	0.349310102	organic cation transport
GOBP	10	0.135460496	0.206780983	0.30853648	quaternary ammonium group transport
GOBP	160	0.212848948	0.30748129	0.409435322	inorganic anion transport
GOBP	38	0.128677708	0.280244096	0.511910123	bicarbonate transport
GOBP	465	0.158224783	0.257209601	0.35558084	organic anion transport
GOBP	165	0.154085319	0.252236798	0.356885766	monocarboxylic acid transport
GOBP	27	0.206218835	0.345217274	0.46335108	bile acid and bile salt transport
GOBP	15	0.123452795	0.220844428	0.299689291	prostaglandin transport
GOBP	25	0.222406927	0.330661105	0.437172476	C4-dicarboxylate transport
GOBP	117	0.179105189	0.277689484	0.371341305	organophosphate ester transport
GOBP	105	0.165804734	0.273764188	0.375821862	monosaccharide transmembrane transport
GOBP	11	0.323503916	0.3744765	0.46841966	nucleotide-sugar transmembrane transport
GOBP	12	0.409833544	0.512919788	0.603360181	polyol transport
GOBP	69	0.190057403	0.279625771	0.380716705	acidic amino acid transport
GOBP	10	0.181798528	0.289641426	0.410866688	aromatic amino acid transport
GOBP	12	0.176805131	0.339827663	0.453438806	basic amino acid transport
GOBP	41	0.203901042	0.305559694	0.42779657	neutral amino acid transport
GOBP	61	0.255018174	0.34676533	0.442570222	L-amino acid transport
GOBP	10	0.254861742	0.342854733	0.466421182	aspartate transmembrane transport
GOBP	17	0.208477751	0.274072455	0.350645298	gamma-aminobutyric acid transport
GOBP	22	0.244656325	0.331297492	0.467836744	L-glutamate transmembrane transport
GOBP	12	0.237480255	0.329720285	0.426239738	glycine transport
GOBP	1924	0.154603073	0.255593026	0.358771579	peptide transport
GOBP	86	0.185885638	0.272728413	0.379385892	amine transport
GOBP	78	0.179110159	0.26953805	0.371117683	monoamine transport
GOBP	316	0.163200518	0.260119532	0.358995524	organic acid transport
GOBP	226	0.147481182	0.237628998	0.333684196	organic hydroxy compound transport
GOBP	32	0.134267879	0.226479804	0.318041872	purine nucleotide transport
GOBP	24	0.117151449	0.219479773	0.322762754	ATP transport
GOBP	31	0.133777995	0.223499647	0.314492493	purine ribonucleotide transport
GOBP	45	0.18004047	0.273672715	0.398831696	dopamine transport
GOBP	21	0.19405589	0.290327892	0.407183286	norepinephrine transport
GOBP	189	0.142387836	0.237865355	0.333487403	drug transport
GOBP	96	0.147422443	0.252269065	0.374605393	fatty acid transport
GOBP	70	0.168114317	0.272043478	0.402684669	long-chain fatty acid transport
GOBP	75	0.216954245	0.314037238	0.416500365	phospholipid transport
GOBP	89	0.195917089	0.311539762	0.427970554	sterol transport
GOBP	18	0.438257302	0.675442758	0.776489905	peroxisomal membrane transport
GOBP	234	0.18905764	0.300815951	0.427865923	nucleobase-containing compound transport
GOBP	14	0.093617908	0.228064319	0.342047691	coenzyme A metabolic process
GOBP	28	0.197824984	0.286566401	0.385310571	nucleobase-containing small molecule interconversion
GOBP	255	0.141689898	0.259131608	0.371813917	energy derivation by oxidation of organic compounds
GOBP	12	0.354830054	0.530415479	0.613595397	CDP-diacylglycerol biosynthetic process
GOBP	863	0.155216558	0.25966915	0.369118005	viral process
GOBP	308	0.17021597	0.270647046	0.36727702	lipid catabolic process
GOBP	13	0.27849796	0.405239854	0.522772915	detection of bacterium
GOBP	22	0.223408318	0.305613544	0.404858624	detection of temperature stimulus
GOBP	446	0.174247218	0.276583254	0.374904954	cell growth
GOBP	316	0.21444353	0.330568195	0.437082051	vesicle organization
GOBP	190	0.149695479	0.250458071	0.352257666	carbohydrate biosynthetic process
GOBP	179	0.150860983	0.252831165	0.370873661	carbohydrate catabolic process
GOBP	315	0.134342055	0.232301093	0.337854048	organic acid biosynthetic process
GOBP	247	0.134863154	0.245833597	0.359429729	organic acid catabolic process
GOBP	477	0.212619405	0.321150655	0.428078616	Wnt signaling pathway
GOBP	27	0.223443195	0.315859829	0.456989745	rhodopsin mediated signaling pathway
GOBP	132	0.133104137	0.213704007	0.319132665	immunoglobulin mediated immune response
GOBP	776	0.176014525	0.295724107	0.40800067	mRNA metabolic process
GOBP	200	0.230253122	0.341597179	0.435247766	rRNA metabolic process
GOBP	35	0.185620519	0.291759302	0.42233834	snRNA metabolic process
GOBP	14	0.1210232	0.230076721	0.439162174	snoRNA metabolic process
GOBP	20	0.172794149	0.303512387	0.4240578	rRNA catabolic process
GOBP	10	0.138843521	0.275401363	0.462648046	tRNA catabolic process
GOBP	114	0.229819371	0.328382071	0.435927694	synaptic vesicle exocytosis
GOBP	11	0.280157612	0.377462395	0.501866157	synaptic vesicle docking
GOBP	19	0.29969211	0.503843917	0.608974341	synaptic vesicle priming
GOBP	109	0.160025367	0.259542297	0.377100308	diterpenoid metabolic process
GOBP	15	0.251760429	0.373423915	0.473977517	terpenoid biosynthetic process
GOBP	156	0.162242727	0.261836866	0.376970449	sterol metabolic process
GOBP	74	0.174685495	0.275456031	0.393036672	sterol biosynthetic process
GOBP	11	0.144553151	0.229990225	0.377970694	sterol catabolic process
GOBP	18	0.110724901	0.199072726	0.303862777	glycoside metabolic process
GOBP	25	0.172748682	0.261136102	0.387209062	snRNA processing
GOBP	11	0.419886494	0.497485239	0.604126364	synaptic vesicle maturation
GOBP	1851	0.150866702	0.255239327	0.3601372	vesicle-mediated transport
GOBP	209	0.26845465	0.396811495	0.512165152	endosomal transport
GOBP	121	0.231192191	0.323560219	0.427463531	regulation of striated muscle tissue development
GOBP	19	0.334913972	0.494358788	0.614985905	iron-sulfur cluster assembly
GOBP	40	0.207686786	0.365026687	0.488723847	telomere capping
GOBP	286	0.230515644	0.339097762	0.442374859	macroautophagy
GOBP	64	0.206978436	0.306200093	0.404164153	positive regulation of macroautophagy
GOBP	162	0.212648281	0.309135927	0.407111354	regulation of macroautophagy
GOBP	32	0.228466392	0.31317498	0.408583545	negative regulation of macroautophagy
GOBP	19	0.30220655	0.449936804	0.577702546	RNA interference
GOBP	16	0.418340885	0.496341053	0.568247425	preassembly of GPI anchor in ER membrane
GOBP	12	0.154859953	0.335840981	0.551378696	gap junction assembly
GOBP	51	0.274313858	0.405441215	0.485859329	O-glycan processing
GOBP	2207	0.153408936	0.252946187	0.354347637	phosphorylation
GOBP	434	0.18666056	0.302198172	0.403505418	dephosphorylation
GOBP	11	0.117314004	0.198358209	0.301132112	neuron remodeling
GOBP	144	0.213382243	0.330491234	0.446396223	morphogenesis of embryonic epithelium
GOBP	22	0.301949545	0.445083753	0.545033667	calcium-independent cell-cell adhesion via plasma membrane cell-adhesion molecules
GOBP	38	0.2321835	0.335130286	0.445904931	calcium-dependent cell-cell adhesion via plasma membrane cell adhesion molecules
GOBP	234	0.216904404	0.326196281	0.421052088	dendrite development
GOBP	117	0.246062972	0.353731841	0.472509435	posttranscriptional gene silencing
GOBP	61	0.160867525	0.276967508	0.419067062	somatic cell DNA recombination
GOBP	57	0.108506976	0.228882529	0.38907776	somatic diversification of immunoglobulins
GOBP	13	0.030790041	0.348889099	0.455887204	somatic hypermutation of immunoglobulin genes
GOBP	50	0.141113311	0.24039337	0.403736584	somatic recombination of immunoglobulin gene segments
GOBP	209	0.264180033	0.372086666	0.478459667	gene silencing
GOBP	1381	0.155235903	0.256713091	0.361098633	cell migration
GOBP	143	0.262649168	0.375278177	0.478573172	cytosolic transport
GOBP	197	0.117385852	0.21543899	0.315176121	protein processing
GOBP	29	0.187841668	0.254788695	0.361589205	peptide hormone processing
GOBP	103	0.16174923	0.267315254	0.383097311	negative regulation of angiogenesis
GOBP	16	0.096837753	0.190433746	0.271792489	protein autoprocessing
GOBP	19	0.261375695	0.440823283	0.525453763	base conversion or substitution editing
GOBP	12	0.127104753	0.497069978	0.636038384	cytidine to uridine editing
GOBP	22	0.205449575	0.370867885	0.45633237	mRNA modification
GOBP	13	0.438835816	0.75771042	0.791026907	protein import into peroxisome matrix
GOBP	744	0.225759011	0.339547874	0.440507389	protein ubiquitination
GOBP	431	0.242162545	0.373280191	0.487563646	covalent chromatin modification
GOBP	418	0.240392024	0.370934645	0.484919864	histone modification
GOBP	120	0.253020675	0.4035229	0.52481659	histone methylation
GOBP	38	0.28714299	0.368100326	0.480294095	histone phosphorylation
GOBP	145	0.221912774	0.340069449	0.456838924	histone acetylation
GOBP	46	0.333545854	0.469187974	0.568102954	histone ubiquitination
GOBP	73	0.237441828	0.375995958	0.51704044	histone deacetylation
GOBP	30	0.522118129	0.629044459	0.71911596	histone demethylation
GOBP	19	0.456169629	0.518488473	0.576258298	histone deubiquitination
GOBP	244	0.225671345	0.352957179	0.462813041	protein deubiquitination
GOBP	36	0.24940136	0.387319825	0.491149335	Rac protein signal transduction
GOBP	74	0.280675382	0.381174606	0.491928255	protein sumoylation
GOBP	17	0.318689076	0.427141051	0.534471157	poly(A)+ mRNA export from nucleus
GOBP	112	0.094684522	0.200008834	0.315340672	antibiotic metabolic process
GOBP	19	0.082309413	0.188150697	0.287583428	antibiotic biosynthetic process
GOBP	52	0.113134122	0.215096863	0.331560869	antibiotic catabolic process
GOBP	35	0.26351367	0.426296297	0.508548965	cytochrome complex assembly
GOBP	14	0.161497576	0.24456707	0.354789667	protein nitrosylation
GOBP	114	0.198720779	0.310052241	0.411030183	regulation of transforming growth factor beta receptor signaling pathway
GOBP	174	0.176867089	0.27500535	0.383604005	protein import
GOBP	17	0.14205078	0.229732649	0.34846598	response to insecticide
GOBP	15	0.19905799	0.307395137	0.386639701	plasma membrane phospholipid scrambling
GOBP	522	0.111394644	0.202423233	0.302315396	drug metabolic process
GOBP	42	0.252492223	0.356128628	0.45152562	stem cell division
GOBP	125	0.220268675	0.342380574	0.455472983	negative regulation of translation
GOBP	58	0.209030621	0.327831258	0.436645613	calcium-ion regulated exocytosis
GOBP	206	0.186244592	0.2895741	0.39482641	regulation of exocytosis
GOBP	38	0.190445102	0.306898225	0.413266089	regulation of calcium ion-dependent exocytosis
GOBP	101	0.269339251	0.395389577	0.512199835	peptidyl-lysine methylation
GOBP	41	0.256515667	0.372057607	0.48410374	peptidyl-lysine trimethylation
GOBP	20	0.38821532	0.507467591	0.5985671	peptidyl-lysine dimethylation
GOBP	10	0.228842026	0.295468658	0.405549285	protein-cofactor linkage
GOBP	286	0.199240181	0.314491292	0.430119795	peptidyl-serine phosphorylation
GOBP	107	0.269792691	0.364555235	0.456536513	peptidyl-threonine phosphorylation
GOBP	344	0.154000996	0.255082982	0.365861659	peptidyl-tyrosine phosphorylation
GOBP	14	0.161497576	0.24456707	0.354789667	peptidyl-cysteine S-nitrosylation
GOBP	27	0.262392668	0.345708242	0.440043542	protein hydroxylation
GOBP	27	0.245501533	0.359591319	0.466292477	keratan sulfate biosynthetic process
GOBP	29	0.099265586	0.199202215	0.30209573	peptide cross-linking
GOBP	15	0.234759552	0.334588589	0.415718317	protein oxidation
GOBP	1139	0.163283797	0.265270837	0.368464909	peptidyl-amino acid modification
GOBP	27	0.254182701	0.369880274	0.473632649	peptidyl-arginine modification
GOBP	30	0.186259878	0.318376859	0.421445846	peptidyl-asparagine modification
GOBP	37	0.181160411	0.298296339	0.419184292	peptidyl-cysteine modification
GOBP	24	0.16623091	0.270158766	0.386166512	peptidyl-glutamic acid modification
GOBP	10	0.278162019	0.363415892	0.45676996	peptidyl-histidine modification
GOBP	350	0.225587414	0.339639539	0.450701747	peptidyl-lysine modification
GOBP	10	0.193557216	0.237310268	0.344096214	peptidyl-methionine modification
GOBP	52	0.206924164	0.297272434	0.386103314	peptidyl-proline modification
GOBP	305	0.188019253	0.301618888	0.418099313	peptidyl-serine modification
GOBP	115	0.259901945	0.354906536	0.445559641	peptidyl-threonine modification
GOBP	346	0.154253585	0.255095314	0.365308984	peptidyl-tyrosine modification
GOBP	15	0.362966952	0.526567761	0.687043386	peptidyl-arginine methylation
GOBP	13	0.352329741	0.46556303	0.56643929	peptidyl-L-cysteine S-palmitoylation
GOBP	13	0.352329741	0.46556303	0.56643929	peptidyl-S-diacylglycerol-L-cysteine biosynthetic process from peptidyl-cysteine
GOBP	29	0.186167322	0.326429377	0.433492859	protein N-linked glycosylation via asparagine
GOBP	13	0.088654682	0.186257021	0.320768275	protein-chromophore linkage
GOBP	23	0.263281474	0.412128191	0.499456578	protein palmitoylation
GOBP	149	0.211536406	0.33330849	0.451180103	internal peptidyl-lysine acetylation
GOBP	157	0.215595429	0.334689632	0.452020263	peptidyl-lysine acetylation
GOBP	11	0.194689912	0.351630362	0.525719025	peptidyl-proline hydroxylation to 4-hydroxy-L-proline
GOBP	12	0.150905764	0.348527963	0.417734111	C-terminal protein amino acid modification
GOBP	16	0.16502528	0.212444217	0.30754107	ether metabolic process
GOBP	97	0.12165466	0.208110374	0.302569876	phenol-containing compound metabolic process
GOBP	11	0.318091326	0.369226496	0.486399228	viral latency
GOBP	27	0.138856282	0.247572894	0.352655237	modulation by virus of host process
GOBP	17	0.127990701	0.265117955	0.367626072	modulation by virus of host cellular process
GOBP	319	0.174577898	0.278432837	0.387226814	viral life cycle
GOBP	10	0.14198839	0.288769636	0.393789402	virion attachment to host cell
GOBP	40	0.349499176	0.47903632	0.581211728	virion assembly
GOBP	33	0.246633663	0.376675338	0.49659051	viral release from host cell
GOBP	121	0.190408897	0.303367403	0.411799969	viral genome replication
GOBP	186	0.196831478	0.319640486	0.447074395	viral gene expression
GOBP	14	0.364602815	0.444435034	0.556765348	viral translation
GOBP	170	0.194675187	0.316889182	0.453145042	viral transcription
GOBP	27	0.174057655	0.268685641	0.354091326	reproductive behavior
GOBP	17	0.219105042	0.342760625	0.435390827	nonribosomal peptide biosynthetic process
GOBP	389	0.15213956	0.252435122	0.352144917	regulation of lipid metabolic process
GOBP	87	0.183846922	0.292227192	0.404740605	regulation of fatty acid metabolic process
GOBP	116	0.145402611	0.240181019	0.342863766	regulation of steroid metabolic process
GOBP	1672	0.15271134	0.251591247	0.353208071	regulation of phosphate metabolic process
GOBP	716	0.163355298	0.259097204	0.358396777	cytokine-mediated signaling pathway
GOBP	65	0.189659298	0.299905982	0.420524921	transmission of nerve impulse
GOBP	32	0.286587823	0.405341761	0.55450998	neuronal action potential
GOBP	52	0.1654689	0.261834954	0.367583556	regulation of vasoconstriction
GOBP	99	0.17762081	0.259431578	0.353165001	sensory perception of pain
GOBP	229	0.148518933	0.259639633	0.365711968	hexose metabolic process
GOBP	83	0.161903608	0.27616966	0.390113116	hexose biosynthetic process
GOBP	48	0.189332439	0.349554222	0.457626695	hexose catabolic process
GOBP	12	0.102433919	0.194605158	0.316161655	pentose metabolic process
GOBP	10	0.154840958	0.260467527	0.39814339	phenol-containing compound catabolic process
GOBP	32	0.145464288	0.292455066	0.395252657	nicotinamide nucleotide biosynthetic process
GOBP	34	0.154304649	0.291247728	0.390171145	pyridine nucleotide metabolic process
GOBP	32	0.145464288	0.292455066	0.395252657	pyridine nucleotide biosynthetic process
GOBP	55	0.306609481	0.41272938	0.537775999	arachidonic acid metabolic process
GOBP	16	0.193179987	0.295751642	0.44597106	leukotriene biosynthetic process
GOBP	11	0.40133311	0.474839289	0.550859956	cyclooxygenase pathway
GOBP	16	0.303792134	0.442410521	0.546351254	lipoxygenase pathway
GOBP	19	0.582674867	0.64032507	0.719062102	epoxygenase P450 pathway
GOBP	12	0.354228633	0.457566912	0.535361161	glycolipid catabolic process
GOBP	99	0.165820961	0.306697991	0.439292319	fatty acid oxidation
GOBP	21	0.203111333	0.326489392	0.421683047	alditol metabolic process
GOBP	23	0.119821222	0.212979376	0.324620914	removal of superoxide radicals
GOBP	37	0.201791704	0.367680551	0.519671948	triglyceride biosynthetic process
GOBP	33	0.223214627	0.358902791	0.455317097	triglyceride catabolic process
GOBP	578	0.132544774	0.235568709	0.34545938	aromatic compound catabolic process
GOBP	16	0.260962738	0.386061042	0.50872573	peptidyl-proline hydroxylation
GOBP	10	0.489808386	0.547356249	0.682104502	oxalate transport
GOBP	20	0.286046461	0.512544111	0.73062881	glucuronate metabolic process
GOBP	11	0.128391562	0.21671267	0.300755755	urea metabolic process
GOBP	928	0.153318049	0.250479634	0.34286211	organophosphate metabolic process
GOBP	20	0.206813231	0.399682131	0.590971606	aerobic electron transport chain
GOBP	44	0.219313119	0.354573557	0.465582874	NAD metabolic process
GOBP	33	0.168381064	0.290004498	0.416425319	deoxyribose phosphate metabolic process
GOBP	369	0.153375819	0.25309597	0.35246586	ribose phosphate metabolic process
GOBP	202	0.138084577	0.232328364	0.331551232	calcium-mediated signaling
GOBP	134	0.1342017	0.216174062	0.322344895	B cell mediated immunity
GOBP	918	0.139683126	0.227725468	0.319200839	cellular homeostasis
GOBP	108	0.13337694	0.221383232	0.316822911	antimicrobial humoral response
GOBP	36	0.128191099	0.199721518	0.28744941	antibacterial humoral response
GOBP	60	0.109851075	0.198862235	0.305930534	secondary metabolic process
GOBP	120	0.197920331	0.291089696	0.381197434	polyol metabolic process
GOBP	929	0.134475486	0.23266796	0.332611792	carboxylic acid metabolic process
GOBP	11	0.244362404	0.3746069	0.60164413	one-carbon compound transport
GOBP	152	0.210891963	0.320598042	0.439707279	stem cell population maintenance
GOBP	24	0.152324528	0.219601896	0.301437041	cytolysis
GOBP	11	0.324322325	0.378012854	0.498936957	L-ascorbic acid metabolic process
GOBP	202	0.158781556	0.26275709	0.364705578	antigen processing and presentation
GOBP	18	0.214622979	0.298170361	0.382769429	antigen processing and presentation of endogenous antigen
GOBP	157	0.171374148	0.280899297	0.37897864	antigen processing and presentation of exogenous antigen
GOBP	81	0.220953194	0.318190853	0.412082361	antigen processing and presentation of exogenous peptide antigen via MHC class II
GOBP	13	0.177761883	0.297751966	0.377127561	axonal transport of mitochondrion
GOBP	75	0.205654718	0.296529477	0.396108621	lipid storage
GOBP	413	0.150716776	0.243749226	0.33960389	second-messenger-mediated signaling
GOBP	177	0.185450588	0.283535755	0.380595547	cAMP-mediated signaling
GOBP	28	0.169011499	0.25639757	0.352892297	cGMP-mediated signaling
GOBP	201	0.177318662	0.272420864	0.369625081	cyclic-nucleotide-mediated signaling
GOBP	572	0.229014691	0.350036217	0.458543353	modification-dependent protein catabolic process
GOBP	750	0.159905318	0.257426894	0.35553868	sexual reproduction
GOBP	40	0.283566513	0.370268046	0.478705	translesion synthesis
GOBP	14	0.141705196	0.229728567	0.316904214	hemoglobin metabolic process
GOBP	107	0.208292811	0.34424846	0.472582461	spinal cord development
GOBP	22	0.220399167	0.411805645	0.501832953	spinal cord patterning
GOBP	20	0.305831665	0.434673976	0.516973611	spinal cord dorsal/ventral patterning
GOBP	17	0.370552222	0.482703724	0.602922037	ventral spinal cord interneuron differentiation
GOBP	56	0.323413692	0.440745022	0.562097885	cell differentiation in spinal cord
GOBP	22	0.414480828	0.52527201	0.605056659	dorsal spinal cord development
GOBP	48	0.251565738	0.392818621	0.53047817	ventral spinal cord development
GOBP	13	0.389394074	0.490013471	0.585940583	spinal cord motor neuron cell fate specification
GOBP	11	0.306417059	0.453616074	0.530209715	ventral spinal cord interneuron specification
GOBP	34	0.262767852	0.402294233	0.526679198	spinal cord motor neuron differentiation
GOBP	14	0.385904821	0.518270721	0.61925619	spinal cord association neuron differentiation
GOBP	39	0.22795043	0.326055062	0.449632536	neural tube patterning
GOBP	21	0.291334971	0.380543275	0.480370768	cell differentiation in hindbrain
GOBP	13	0.16531312	0.276786611	0.461869703	cell proliferation in hindbrain
GOBP	15	0.21503831	0.384389843	0.473373897	cell migration in hindbrain
GOBP	69	0.223112461	0.347384447	0.471542426	diencephalon development
GOBP	241	0.196257757	0.295692693	0.395578221	telencephalon development
GOBP	15	0.230499888	0.350707746	0.451078186	dentate gyrus development
GOBP	159	0.191835077	0.292542593	0.388036492	pallium development
GOBP	23	0.264896575	0.338999346	0.459753892	subpallium development
GOBP	49	0.252643531	0.357472336	0.493514361	cranial nerve development
GOBP	10	0.240585468	0.311960063	0.389737327	pons development
GOBP	99	0.173809891	0.266459869	0.367826272	cerebellum development
GOBP	13	0.219885789	0.297225043	0.421415885	optic nerve development
GOBP	12	0.265002296	0.335363657	0.428971596	trigeminal nerve development
GOBP	10	0.260906548	0.38290202	0.483837498	facial nerve development
GOBP	42	0.182948504	0.28795997	0.403698369	hindbrain morphogenesis
GOBP	38	0.193815637	0.292542505	0.403643885	cerebellum morphogenesis
GOBP	30	0.178536698	0.322441569	0.437771749	ventricular system development
GOBP	27	0.257625578	0.371393763	0.497729484	cranial nerve morphogenesis
GOBP	10	0.242243104	0.385531115	0.459656041	cranial nerve structural organization
GOBP	10	0.260906548	0.38290202	0.483837498	facial nerve morphogenesis
GOBP	12	0.094060848	0.197640069	0.355390932	lateral ventricle development
GOBP	77	0.229957044	0.316178199	0.41561139	nerve development
GOBP	26	0.235020438	0.338440363	0.427970276	cerebellar Purkinje cell layer development
GOBP	13	0.245363793	0.339043349	0.44485214	cerebellar granular layer development
GOBP	16	0.284591155	0.373444029	0.462780575	cerebellar Purkinje cell layer morphogenesis
GOBP	12	0.28651479	0.380815514	0.479568586	cerebellar Purkinje cell layer formation
GOBP	47	0.201769278	0.302458423	0.40840132	cerebellar cortex development
GOBP	31	0.1988455	0.307736416	0.412356125	cerebellar cortex morphogenesis
GOBP	23	0.274191059	0.351911328	0.459038736	cerebellar cortex formation
GOBP	265	0.145278973	0.235817715	0.328598803	developmental maturation
GOBP	11	0.279618782	0.38202992	0.476725271	cerebellar Purkinje cell differentiation
GOBP	17	0.259584511	0.330291718	0.440435305	striatum development
GOBP	102	0.197845245	0.295608605	0.388181768	limbic system development
GOBP	36	0.150181868	0.256355353	0.341729662	substantia nigra development
GOBP	77	0.200138978	0.295631856	0.38220414	hippocampus development
GOBP	31	0.234115788	0.349503789	0.456102663	olfactory bulb development
GOBP	14	0.323934262	0.487456668	0.641741668	glial cell fate commitment
GOBP	106	0.166371635	0.246029283	0.33367763	glial cell development
GOBP	16	0.318194484	0.417480087	0.537769441	preganglionic parasympathetic fiber development
GOBP	11	0.221623371	0.312327726	0.416499672	thalamus development
GOBP	38	0.187572742	0.30132912	0.397267275	cerebral cortex cell migration
GOBP	29	0.219703522	0.324474012	0.421872575	cerebral cortex radially oriented cell migration
GOBP	22	0.183094503	0.287476178	0.366586735	cerebral cortex radial glia guided migration
GOBP	11	0.218346477	0.273162368	0.365691941	layer formation in cerebral cortex
GOBP	11	0.123412562	0.282097456	0.402712034	substrate-independent telencephalic tangential migration
GOBP	11	0.123412562	0.282097456	0.402712034	substrate-independent telencephalic tangential interneuron migration
GOBP	28	0.273844548	0.399715383	0.50138886	cell proliferation in forebrain
GOBP	18	0.170855098	0.265175072	0.347360276	hypothalamus development
GOBP	10	0.238735091	0.28822805	0.389678308	pyramidal neuron differentiation
GOBP	23	0.330522085	0.440047166	0.587165825	forebrain regionalization
GOBP	59	0.264199628	0.388121025	0.503380919	forebrain generation of neurons
[truncated: 4,699 more rows]
